# Supplementary material for: En torno a la mentalidad de José Rodríguez Carracido
Source: Royal Society of Chemistry journal article supplement (doi:10.1039/d3cs00837a), 2006-01-01
Supplement: d3cs00837a1.xlsx [file d3cs00837a1.xlsx]

## Sheet: Sheet1
Compound Name	SMILES († is the constituent unit of the polymer's repeating structure)
DOBNA	C12=CC=CC(OC3=C4C=CC=C3)=C1B4C(C=CC=C5)=C5O2
DOBNA-Ph-2	C12=CC=CC(OC3=C4C=C(C5=CC=CC=C5)C=C3)=C1B4C(C=C(C6=CC=CC=C6)C=C7)=C7O2
DOBNA-Ph-3	C12=C(C3=CC=CC=C3)C=C(C4=CC=CC=C4)C(OC5=C6C=CC=C5)=C1B6C(C=CC=C7)=C7O2
DOBNA-Phenox	C12=CC(N3C(C=CC=C4)=C4OC5=C3C=CC=C5)=CC(OC6=C7C=CC=C6)=C1B7C(C=CC=C8)=C8O2
DOBNA-Hel	C1(OC2=C3C(C=CC=C4)=C4C=C2)=CC=CC5=C1B3C6=C(C=CC7=C6C=CC=C7)O5
DOBNA-Tol	CC1=CC=CC=C1C2=CC3=C(C=C2)B4C5=C(OC6=C4C=CC(C7=C(C)C=CC=C7)=C6)C=CC=C5O3
TMCz-BO	CC1=CC(C)=CC(C2=C3C(C)=CC(C)=C2)=C1N3C4=CC(OC5=C6C=CC=C5)=C(B6C(C=CC=C7)=C7O8)C8=C4
TMCz-3P	CC1=CC(C)=CC(C2=C3C(C)=CC(C)=C2)=C1N3C4=CC(OC5=C6C=CC(C7=CC=CC=C7)=C5)=C(B6C(C=CC(C8=CC=CC=C8)=C9)=C9O%10)C%10=C4
TDBA-Cz	CC(C(C=C1)=CC2=C1OC3=C(N4C(C=CC(C(C)(C)C)=C5)=C5C6=C4C=CC(C(C)(C)C)=C6)C=C(N7C(C=CC(C(C)(C)C)=C8)=C8C9=C7C=CC(C(C)(C)C)=C9)C%10=C3B2C%11=C(C=CC(C(C)(C)C)=C%11)O%10)(C)C
DOBNA-Ph	C12=CC=CC(OC3=C4C=CC(C5=CC=CC=C5)=C3)=C1B4C(C=CC(C6=CC=CC=C6)=C7)=C7O2
B1	CCCCN1N=CN=C1C2=CC3=C(OC4=C(B35)C(OC6=C5C=C(C7=NC=NN7CCCC)C=C6)=CC=C4)C=C2
B2-OH	OC1=CC2=C(OC3=CC=CC(O4)=C3B2C5=C4C=CC(C6=NC=NN6CCCC)=C5)C=C1
BOS	C12=CC=CC(SC3=C4C=CC=C3)=C1B4C(C=CC=C5)=C5O2
BSS	C12=CC=CC(SC3=C4C=CC=C3)=C1B4C(C=CC=C5)=C5S2
tBuAcBO	CC1(C)C2=CC=CC=C2N(C3=C1C=CC=C3)C4=CC5=C(C=C4)B6C7=C(OC8=C6C=C(C(C)(C)C)C=C8)C=CC=C7O5
B3	CN(C)C1=CC2=C(OC3=CC=CC(O4)=C3B2C5=C4C=CC(C6=NC=NN6CCCC)=C5)C=C1
DOBNA-Et	CCC(C=C1)=CC2=C1OC3=CC=CC4=C3B2C5=C(C=CC(CC)=C5)O4
m-Br-DBNA	BrC(C=C1)=CC2=C1OC3=CC=CC4=C3B2C5=C(C=CC(Br)=C5)O4
2b	BrC(C=C1)=CC2=C1B3C4=C(O2)C=CC=C4OC5=C3C=CC(Br)=C5
7	BrC(C=C1)=CC2=C1B3C4=C(O2)C=CC=C4OC5=C3C=CC(Br)=C5
DBA-p2Br	BrC(C=C1)=CC2=C1B3C4=C(O2)C=CC=C4OC5=C3C=CC(Br)=C5
m’-Br-DBNA	BrC1=CC=CC2=C1OC3=C(B2C(C=CC=C4Br)=C4O5)C5=CC=C3
Br-TDBA	BrC1=CC(OC2=C3C=C(C(C)(C)C)C=C2)=C(B3C(C=C(C(C)(C)C)C=C4)=C4O5)C5=C1
TB-Br	BrC1=CC(OC2=C3C=C(C(C)(C)C)C=C2)=C(B3C(C=C(C(C)(C)C)C=C4)=C4O5)C5=C1
TDBA	BrC1=CC(OC2=C3C=C(C(C)(C)C)C=C2)=C(B3C(C=C(C(C)(C)C)C=C4)=C4O5)C5=C1
2	BrC1=CC(OC2=C3C=C(C(C)(C)C)C=C2)=C(B3C(C=C(C(C)(C)C)C=C4)=C4O5)C5=C1
4	BrC1=CC(OC2=C3C=C(C(C)(C)C)C=C2)=C(B3C(C=C(C(C)(C)C)C=C4)=C4O5)C5=C1
Br-TOSBA	BrC1=CC(SC2=C3C=C(C(C)(C)C)C=C2)=C(B3C(C=C(C(C)(C)C)C=C4)=C4O5)C5=C1
Br-TSBA	BrC1=CC(SC2=C3C=C(C(C)(C)C)C=C2)=C(B3C(C=C(C(C)(C)C)C=C4)=C4S5)C5=C1
Br-DBA	BrC1=CC(OC2=C3C=CC=C2)=C(B3C(C=CC=C4)=C4O5)C5=C1
6a	BrC1=CC(OC2=C3C=CC=C2)=C(B3C(C=CC=C4)=C4O5)C5=C1
2b	BrC1=CC(OC2=C3C=CC=C2)=C(B3C(C=CC=C4)=C4O5)C5=C1
BOSBr	BrC1=CC(SC2=C3C=CC=C2)=C(B3C(C=CC=C4)=C4O5)C5=C1
BSSBr	BrC1=CC(SC2=C3C=CC=C2)=C(B3C(C=CC=C4)=C4S5)C5=C1
6c	BrC1=CC(SC2=C3C=CC=C2)=C(B3C(C=CC=C4)=C4S5)C5=C1
BOO-F-Br	BrC1=CC(OC2=C3C=C(F)C=C2)=C(B3C(C=C(F)C=C4)=C4O5)C5=C1
pMDBA-Br	BrC1=CC(OC2=C3C=C(C)C=C2)=C(B3C(C=C(C)C=C4)=C4O5)C5=C1
mMDBA-Br	BrC1=CC(OC2=C3C=CC(C)=C2)=C(B3C(C=CC(C)=C4)=C4O5)C5=C1
DOBNA-Et-Br	BrC1=CC(OC2=C3C=C(CC)C=C2)=C(B3C(C=C(CC)C=C4)=C4O5)C5=C1
DOBNA-C8-Br	BrC1=CC(OC2=C3C=C(C(CC(C)(C)C)(C)C)C=C2)=C(B3C(C=C(C(C)(C)CC(C)(C)C)C=C4)=C4O5)C5=C1
BO-Br	BrC1=CC(OC2=C3C=CC(C(F)(F)F)=C2)=C(B3C(C=CC(C(F)(F)F)=C4)=C4O5)C5=C1
DOBNA-Br3	BrC1=CC(OC2=C3C=CC(Br)=C2)=C(B3C(C=CC(Br)=C4)=C4O5)C5=C1
Br-TDBA	BrC1=CC(OC2=C3C=C(C(C)(C)C)C=C2)=C(B3C(C=C(C(C)(C)C)C=C4)=C4O5)C5=C1
Br-DBA	BrC1=CC(OC2=C3C=CC=C2)=C(B3C(C=CC=C4)=C4O5)C5=C1
5	BrC1=CC(OC2=C3C=CC=C2)=C(B3C(C=CC=C4)=C4O5)C5=C1
DOBNA-Pyr	C12=CC(C3=CC=CC=N3)=CC(OC4=C5C=CC=C4)=C1B5C(C=CC=C6)=C6O2
DABNA-1	C12=CC=CC(N(C3=CC=CC=C3)C4=C5C=CC=C4)=C1B5C(C=CC=C6)=C6N2C7=CC=CC=C7
DABNA-2	C12=CC=CC(N(C3=CC=CC=C3)C4=C5C=CC(N(C6=CC=CC=C6)C7=CC=CC=C7)=C4)=C1B5C(C=CC(C8=CC=CC=C8)=C9)=C9N2C%10=CC(C%11=CC=CC=C%11)=CC=C%10
BN3	C12=CC=CC(N(C3=CC=CC=C3)C4=C5C6=CC=C4)=C1B5C(C(N6C7=CC=CC=C7)=CC=C8)=C8N2C9=CC=CC=C9
t-DABNA	CC(C(C=C1)=CC2=C1N(C3=CC=C(C(C)(C)C)C=C3)C4=CC=CC5=C4B2C6=C(C=CC(C(C)(C)C)=C6)N5C7=CC=C(C(C)(C)C)C=C7)(C)C
BN-DMAC	CC1(C)C2=CC=CC3=C2N(C4=C1C=CC=C4)C5=CC=CC6=C5B3C7=C8N6C9=CC=CC=C9C(C)(C)C8=CC=C7
BN-DPAC	C12=CC=CC(N3C4=C5C=CC=C4C(C6=CC=CC=C6)(C7=CC=CC=C7)C8=CC=CC=C38)=C1B5C(C=CC=C9C%10(C%11=CC=CC=C%11)C%12=CC=CC=C%12)=C9N2C%13=C%10C=CC=C%13
2PXZBN	C12=CC=CC(N3C4=C5C=CC=C4OC6=CC=CC=C36)=C1B5C(C=CC=C7O8)=C7N2C9=C8C=CC=C9
BN1	C12=CC=CC(N3C4=C5C=CC=C4OC6=CC=CC=C36)=C1B5C(C=CC=C7O8)=C7N2C9=C8C=CC=C9
2PTZBN	C12=CC=CC(N3C4=C5C=CC=C4SC6=CC=CC=C36)=C1B5C(C=CC=C7S8)=C7N2C9=C8C=CC=C9
BN3	C12=CC=CC(N3C4=C5C=CC=C4SC6=CC=CC=C36)=C1B5C(C=CC=C7S8)=C7N2C9=C8C=CC=C9
BN2	CC1(C)C2=CC=CC3=C2N(C4=C1C=CC=C4)C5=CC=CC6=C5B3C7=C(C=CC(C(C)(C)C)=C7)N6C8=CC=C(C(C)(C)C)C=C8
BN4	C12=CC=CC(N3C4=C5C=CC=C4C(C6=CC=CC=C6)(C7=CC=CC=C7)C8=CC=CC=C38)=C1B5C(C=CC=C9S%10)=C9N2C%11=C%10C=CC=C%11
BN5	CC1(C)C2=CC=CC3=C2N(C4=CC=CC=C41)C5=C(B3C(C=CC=C6S7)=C6N8C9=C7C=CC=C9)C8=CC=C5
helicene-BN	C12=CC=CC(N3C4=C5C=CC=C4SC6=CC=C7C(C=CC=C7)=C36)=C1B5C(C=CC=C8S9)=C8N2C%10=C9C=CC%11=C%10C=CC=C%11
BNSSe	C12=CC=CC(N3C4=C5C=CC=C4[Se]C6=CC=CC=C36)=C1B5C(C=CC=C7S8)=C7N2C9=C8C=CC=C9
BNSeSe	C12=CC=CC(N3C4=C5C=CC=C4[Se]C6=CC=CC=C36)=C1B5C(C=CC=C7[Se]8)=C7N2C9=C8C=CC=C9
TBE01	CC(C(C=C1)=CC2=C1N(C3=CC=C(C(C)(C)C)C=C3)C4=CC=CC5=C4B2C6=C(C=C(N7C(C=CC=C8)=C8C9=C7C=CC=C9)C=C6)N5C%10=CC=C(C%11=CC=CC=C%11)C=C%10)(C)C
TBE02	C12=CC=CC(N(C3=CC=C(C4=CC=CC=C4)C=C3)C5=C6C=CC(N7C(C=CC=C8)=C8C9=C7C=CC=C9)=C5)=C1B6C(C=CC(N%10C(C=CC=C%11)=C%11C%12=C%10C=CC=C%12)=C%13)=C%13N2C%14=CC=C(C%15=CC=CC=C%15)C=C%14
TCZ-F-DABNA	CC(C1=CC(N2C3=C(C=CC=C3N4C5=CC=C(C(C)(C)C)C=C56)B7C8=C(N9C%10=C7C=CC=C%10N(C%11=C%12C=C(C(C)(C)C)C=C%11)C%13=C%12C=C(C(C)(C)C)C=C9%13)C=CC=C82)=C4C6=C1)(C)C
BNDIP	CC(C1=CC(N2C3=C(C=CC=C3N4C5=CC=C(C(C)(C)C)C=C56)B7C8=C(N9C%10=C7C=CC=C%10N(C%11=C%12C=C(C(C)(C)C)C=C%11)C%13=C%12C=C(C(C)(C)C)C=C9%13)C=CC=C82)=C4C6=C1)(C)C
BNIP-tBuDPAC	CC(C1=CC(N2C3=C(C=CC=C3N4C5=CC=C(C(C)(C)C)C=C56)B7C8=C(N9C%10=C7C=CC=C%10C(C%11=CC(C(C)(C)C)=CC(C(C)(C)C)=C%11)(C%12=CC(C(C)(C)C)=CC(C(C)(C)C)=C%12)C%13=CC=CC=C9%13)C=CC=C82)=C4C6=C1)(C)C
Tp-DABNA	C12=CC=CC(N(C3=CC=C([C@H]4C5=C(C=CC=C5)[C@@H]6C7=C4C=CC=C7)C6=C3)C8=C9C=C%10C(C%11C%12=C(C=CC=C%12)C%10C%13=C%11C=CC=C%13)=C8)=C1B9C(C=C%14C(C%15C%16=C(C=CC=C%16)C%14C%17=C%15C=CC=C%17)=C%18)=C%18N2C%19=CC%20=C([C@@H]%21C%22=C(C=CC=C%22)[C@H]%20C%23=C%21C=CC=C%23)C=C%19
M-tDABNA	CC1=CC(N(C2=CC=C(C(C)(C)C)C=C2)C3=C4C=C(C(C)(C)C)C=C3)=C(B4C(C=C(C(C)(C)C)C=C5)=C5N6C7=CC=C(C(C)(C)C)C=C7)C6=C1
TPXZBN	C12=CC(N3C(C=CC=C4)=C4OC5=C3C=CC=C5)=CC(N6C7=C8C=CC=C7OC9=CC=CC=C69)=C1B8C(C=CC=C%10O%11)=C%10N2C%12=C%11C=CC=C%12
DPXZCZBN	CC(C1=CC(C2=C3C=CC(C(C)(C)C)=C2)=C(C=C1)N3C4=CC(N5C6=C7C=CC=C6OC8=CC=CC=C58)=C(B7C(C=CC=C9O%10)=C9N%11C%12=C%10C=CC=C%12)C%11=C4)(C)C
DMAc-BN	C12=CC=CC(N3C4=C5C=CC=C4CC6=CC=CC=C36)=C1B5C(C=CC=C7C8)=C7N2C9=C8C=CC=C9
PXZ-BN	C12=CC=CC(N3C4=C5C=CC=C4OC6=CC=CC=C36)=C1B5C(C=CC=C7O8)=C7N2C9=C8C=CC=C9
t-DABNA-dtB	CC(C(C=C1)=CC=C1N(C2=C3C=C(C(C)(C)C)C=C2)C4=C(B3C(C=C(C(C)(C)C)C=C5)=C5N6C7=CC=C(C(C)(C)C)C=C7)C6=CC(C8=CC(C(C)(C)C)=CC(C(C)(C)C)=C8)=C4)(C)C
DTBA-BN2	C12=CC=CC3=C1B(C4=C5N2C6=C(C=CC=C6)C7=C(C=CC=C7)C5=CC=C4)C8=C9N3C(C=CC=C%10)=C%10C(C=CC=C%11)=C%11C9=CC=C8
DtBuCzB	CC(C1=CC2=C(C3=C1)N(C4=CC=C(C(C)(C)C)C=C43)C5=C(B2C(C=C(C(C)(C)C)C=C67)=C6N8C9=C7C=C(C(C)(C)C)C=C9)C8=CC=C5)(C)C
BCzBN	CC(C1=CC2=C(C3=C1)N(C4=CC=C(C(C)(C)C)C=C43)C5=C(B2C(C=C(C(C)(C)C)C=C67)=C6N8C9=C7C=C(C(C)(C)C)C=C9)C8=CC=C5)(C)C
BBCz-SB	CC(C1=CC2=C(C3=C1)N(C4=CC=C(C(C)(C)C)C=C43)C5=C(B2C(C=C(C(C)(C)C)C=C67)=C6N8C9=C7C=C(C(C)(C)C)C=C9)C8=CC=C5)(C)C
DtBuPhCzB	CC(C(C=C1)=CC=C1C2=CC3=C(C4=C2)N(C5=CC=C(C6=CC=C(C(C)(C)C)C=C6)C=C54)C7=C(B3C(C=C(C8=CC=C(C(C)(C)C)C=C8)C=C9%10)=C9N%11C%12=C%10C=C(C%13=CC=C(C(C)(C)C)C=C%13)C=C%12)C%11=CC=C7)(C)C
CzBN	C12=CC=CC(N3C4=C5C=CC=C4C6=CC=CC=C36)=C1B5C(C=CC=C78)=C7N2C9=C8C=CC=C9
Cz-B	C12=CC=CC(N3C4=C5C=CC=C4C6=CC=CC=C36)=C1B5C(C=CC=C78)=C7N2C9=C8C=CC=C9
DCzB	C12=CC=CC(N3C4=C5C=CC=C4C6=CC=CC=C36)=C1B5C(C=CC=C78)=C7N2C9=C8C=CC=C9
γ-Cb-B	C12=CC=CC(N3C4=C5C=CC=C4C6=CN=CC=C36)=C1B5C(C=CC=C78)=C7N2C9=C8C=NC=C9
TCz-B	C12=CC=CC(N3C4=C5C=C(N6C(C=CC=C7)=C7C8=C6C=CC=C8)C=C4C9=CC(N%10C(C=CC=C%11)=C%11C%12=C%10C=CC=C%12)=CC=C39)=C1B5C(C=C(N%13C(C=CC=C%14)=C%14C%15=C%13C=CC=C%15)C=C%16%17)=C%16N2C%18=C%17C=C(N%19C(C=CC=C%20)=C%20C%21=C%19C=CC=C%21)C=C%18
DACz-B	CC(C=C1)=CC=C1N(C2=CC=C(C)C=C2)C(C=C3)=CC4=C3N5C6=C(C=C(N(C7=CC=C(C)C=C7)C8=CC=C(C)C=C8)C=C64)B9C%10=C(N%11C%12=C9C=C(N(C%13=CC=C(C)C=C%13)C%14=CC=C(C)C=C%14)C=C%12C%15=CC(N(C%16=CC=C(C)C=C%16)C%17=CC=C(C)C=C%17)=CC=C%11%15)C=CC=C%105
BN1	CC(C1=CC2=C(C3=C1)N(C4=CC=C(C(C)(C)C)C=C43)C5=C(B2C(C=C(N6C(C=CC=C7)=C7C8=C6C=CC=C8)C=C9%10)=C9N%11C%12=C%10C=C(N%13C(C=CC=C%14)=C%14C%15=C%13C=CC=C%15)C=C%12)C%11=CC=C5)(C)C
BN2	CC(C1=CC2=C(C3=C1)N(C4=CC=C(C(C)(C)C)C=C43)C5=C(B2C(C=C(N(C6=CC=CC=C6)C7=CC=CC=C7)C=C89)=C8N%10C%11=C9C=C(N(C%12=CC=CC=C%12)C%13=CC=CC=C%13)C=C%11)C%10=CC=C5)(C)C
BN3	C12=CC=CC(N3C4=C5C=C(N(C6=CC=CC=C6)C7=CC=CC=C7)C=C4C8=CC(N(C9=CC=CC=C9)C%10=CC=CC=C%10)=CC=C38)=C1B5C(C=C(N(C%11=CC=CC=C%11)C%12=CC=CC=C%12)C=C%13%14)=C%13N2C%15=C%14C=C(N(C%16=CC=CC=C%16)C%17=CC=CC=C%17)C=C%15
BN-ICz-1	CC(C(C=C1C2=C3C=CC(C(C)(C)C)=C2)=CC4=C1N3C5=CC=CC6=C5B4C7=C8N6C9=CC=CC=C9C8=CC%10=C7C%11=CC=CC=C%11N%10C%12=CC=CC=C%12)(C)C
BN-ICz-2	CC(C(C=C1C2=C3C=CC(C(C)(C)C)=C2)=CC4=C1N3C5=CC=CC6=C5B4C7=C8N6C9=CC=CC=C9C8=CC%10=C7C%11=CC=CC=C%11N%10C%12=CC(N%13C(C=CC(C(C)(C)C)=C%14)=C%14C%15=C%13C=CC(C(C)(C)C)=C%15)=CC=C%12)(C)C
BN-Y	CC(C)(C1=CC=CC=C1)C(C=C2)=CC=C2N(C3=CC=C4N(C5=C6C=C(N(C7=CC=C(C(C)(C)C8=CC=CC=C8)C=C7)C9=CC=C(C(C)(C)C%10=CC=CC=C%10)C=C9)C=C5C4=C3)C%11=C(B6C(C=C(N(C%12=CC=C(C(C)(C)C%13=CC=CC=C%13)C=C%12)C%14=CC=C(C(C)(C)C%15=CC=CC=C%15)C=C%14)C=C%16%17)=C%16N%18C%19=C%17C=C(N(C%20=CC=C(C(C)(C)C%21=CC=CC=C%21)C=C%20)C%22=CC=C(C(C)(C)C%23=CC=CC=C%23)C=C%22)C=C%19)C%18=CC=C%11)C%24=CC=C(C(C)(C)C%25=CC=CC=C%25)C=C…
BN-DICz	CC(C1=CC=C2N(C3=C4C=C(C(C)(C)C)C=C3C2=C1)C5=C(B64)C(N7C8=C6C(C9=CC=CC=C9%10)=C(N%10C%11=C%12C=CC=C%11)C%12=C8C%13=C7C=CC=C%13)=CC=C5)(C)C
3-C2	C12=CC=CC(N3C(C=CC4=C5C6=C(C=CC=C6)C=C4)=C5C7=C3C8=CC9=C7C%10=C(C=CC=C%10)C=C9)=C1B8C%11=CC(C=CC%12=C%13C=CC=C%12)=C%13C%14=C%11N2C%15=C%14C(C(C=CC=C%16)=C%16C=C%17)=C%17C=C%15
3-Cs	C12=CC=CC(N3C(C4=CC5=C6C7=C(C=CC=C7)C=C5)=C6C8=C3C=CC9=C8C(C=CC=C%10)=C%10C=C9)=C1B4C%11=CC(C=CC%12=C%13C=CC=C%12)=C%13C%14=C%11N2C%15=C%14C(C(C=CC=C%16)=C%16C=C%17)=C%17C=C%15
4-C1	CC(C1=CC(C2=C3C4=CC(C(C)(C)C)=C2)=C(C=C1)N3C5=C(B64)C(N7C(C6=CC8=C9C%10=C(C=CC=C%10)C=C8)=C9C%11=C7C=CC%12=C%11C(C=CC=C%13)=C%13C=C%12)=CC=C5)(C)C
SpDCz	CC(C1=CC2=C(C3=C1)N(C4=CC=C(C(C)(C)C)C=C43)C5=C(B2C(C=CC=C67)=C6N8C9=C7C%10=C(N%11C%12=C(C=C(C(C)(C)C)C=C%12C%13=C%11C=CC(C(C)(C)C)=C%13)C%10%14C%15=C(C=CC=C%15)C%16=C%14C=CC=C%16)C=C9)C8=CC=C5)(C)C
DSpDCz	CC(C(C=C1C2=C3C=CC(C(C)(C)C)=C2)=CC4=C1N3C(C=C5)=C(C46C7=C(C=CC=C7)C8=C6C=CC=C8)C9=C5N%10C%11=C(C=CC=C%119)B%12C%13=C(N%14C%15=C%12C=CC=C%15C%16=C%17C(N(C%18=CC=C(C(C)(C)C)C=C%18%19)C(C%19=CC(C(C)(C)C)=C%20)=C%20C%17%21C%22=C(C=CC=C%22)C%23=C%21C=CC=C%23)=CC=C%14%16)C=CC=C%13%10)(C)C
CzBO	C12=CC=CC(OC3=C4C=CC=C3)=C1B4C(C=CC=C56)=C5N2C7=C6C=CC=C7
CzBS	C12=CC=CC(SC3=C4C=CC=C3)=C1B4C(C=CC=C56)=C5N2C7=C6C=CC=C7
CzBSe	C12=CC=CC([Se]C3=C4C=CC=C3)=C1B4C(C=CC=C56)=C5N2C7=C6C=CC=C7
BON-D0	CC(C(C=C1C2=C3C=CC(C(C)(C)C)=C2)=CC4=C1N3C5=CC=CC6=C5B4C7=C(C=CC=C7)O6)(C)C
NBO	CC(C(C=C1C2=C3C=CC(C(C)(C)C)=C2)=CC4=C1N3C5=CC=CC6=C5B4C7=C(C=CC=C7)O6)(C)C
Cz-BSN	CC(C1=CC=C2C(C3=CC(C(C)(C)C)=CC4=C3N2C5=C6B4C7=C(SC6=CC=C5)C=CC=C7)=C1)(C)C
Cz-BSeN	CC(C(C=C1)=CC2=C1N3C4=C(C=C(C(C)(C)C)C=C42)B5C6=C([Se]C7=C5C=CC=C7)C=CC=C63)(C)C
CzBNO	CC(C(C=C1)=CC2=C1OC3=CC=CC4=C3B2C5=C6N4C7=CC=CC=C7C6=CC=C5)(C)C
SOBN	C12=CC=CC(N3C4=C5C=CC=C4C6=CC=CC=C36)=C1B5C(C=C7C(CCCC7)=C8)=C8O2
BON-D1	CC(C(C=C1)=CC2=C1N(C3=C2C=C(C(C)(C)C)C=C3)C(C=C4)=CC5=C4N6C7=C(C=C(N8C(C=CC(C(C)(C)C)=C9)=C9C%10=C8C=CC(C(C)(C)C)=C%10)C=C75)B%11C%12=C(OC%13=C%11C=CC=C%13)C=CC=C%126)(C)C
BON-D2	CC(C(C=C1)=CC2=C1N(C3=C2C=C(C(C)(C)C)C=C3)C4=CC(C5=C6C=CC(N7C(C=CC(C(C)(C)C)=C8)=C8C9=C7C=CC(C(C)(C)C)=C9)=C5)=C(C=C4)N6C(C=C%10C%11=C%12C=CC(N%13C(C=CC(N%14C(C=CC(C(C)(C)C)=C%15)=C%15C%16=C%14C=CC(C(C)(C)C)=C%16)=C%17)=C%17C%18=C%13C=CC(N%19C(C=CC(C(C)(C)C)=C%20)=C%20C%21=C%19C=CC(C(C)(C)C)=C%21)=C%18)=C%11)=CC%22=C%10N%12C%23=CC=CC%24=C%23B%22C%25=C(C=CC=C%25)O%24)(C)C
2F-BN	FC(C=CC=C1)=C1C2=CC(N3C4=C5C=C(C(C)(C)C)C=C4C6=CC(C(C)(C)C)=CC=C36)=C(B5C(C=C(C(C)(C)C)C=C78)=C7N9C%10=C8C=C(C(C)(C)C)C=C%10)C9=C2
3F-BN	FC1=CC=CC(C2=CC(N3C4=C5C=C(C(C)(C)C)C=C4C6=CC(C(C)(C)C)=CC=C36)=C(B5C(C=C(C(C)(C)C)C=C78)=C7N9C%10=C8C=C(C(C)(C)C)C=C%10)C9=C2)=C1
4F-BN	FC(C=C1)=CC=C1C2=CC(N3C4=C5C=C(C(C)(C)C)C=C4C6=CC(C(C)(C)C)=CC=C36)=C(B5C(C=C(C(C)(C)C)C=C78)=C7N9C%10=C8C=C(C(C)(C)C)C=C%10)C9=C2
TW-BN	CC(C=C(C)C=C1C)=C1C2=CC(N3C4=C5C=C(C(C)(C)C)C=C4C6=CC(C(C)(C)C)=CC=C36)=C(B5C(C=C(C(C)(C)C)C=C78)=C7N9C%10=C8C=C(C(C)(C)C)C=C%10)C9=C2
TCzBN-TMPh	CC(C=C(C)C=C1C)=C1C2=CC(N3C4=C5C=C(C(C)(C)C)C=C4C6=CC(C(C)(C)C)=CC=C36)=C(B5C(C=C(C(C)(C)C)C=C78)=C7N9C%10=C8C=C(C(C)(C)C)C=C%10)C9=C2
TPh-BN	CC(C1=CC2=C(C3=C1)N(C4=CC=C(C(C)(C)C)C=C43)C5=C(B2C(C=C(C(C)(C)C)C=C67)=C6N8C9=C7C=C(C(C)(C)C)C=C9)C8=CC(C%10=CC(C%11=CC=CC=C%11)=CC(C%12=CC=CC=C%12)=C%10)=C5)(C)C
pCz-BN	CC(C1=CC2=C(C3=C1)N(C4=CC=C(C(C)(C)C)C=C43)C5=C(B2C(C=C(C(C)(C)C)C=C67)=C6N8C9=C7C=C(C(C)(C)C)C=C9)C8=CC(C%10=CC=C(N%11C(C=CC=C%12)=C%12C%13=C%11C=CC=C%13)C=C%10)=C5)(C)C
mCz-BN	CC(C1=CC2=C(C3=C1)N(C4=CC=C(C(C)(C)C)C=C43)C5=C(B2C(C=C(C(C)(C)C)C=C67)=C6N8C9=C7C=C(C(C)(C)C)C=C9)C8=CC(C%10=CC=CC(N%11C(C=CC=C%12)=C%12C%13=C%11C=CC=C%13)=C%10)=C5)(C)C
TCzBN-DPF	CC(C1=CC2=C(C3=C1)N(C4=CC=C(C(C)(C)C)C=C43)C5=C(B2C(C=C(C(C)(C)C)C=C67)=C6N8C9=C7C=C(C(C)(C)C)C=C9)C8=CC(C%10=CC=C(C(C=CC=C%11)=C%11C%12(C%13=CC=CC=C%13)C%14=CC=CC=C%14)C%12=C%10)=C5)(C)C
TCzBN-oPh	CC(C1=CC2=C(C3=C1)N(C4=CC=C(C(C)(C)C)C=C43)C5=C(B2C(C=C(C(C)(C)C)C=C67)=C6N8C9=C7C=C(C(C)(C)C)C=C9)C8=CC(C%10=CC=CC=C%10C%11=CC=CC=C%11)=C5)(C)C
BN-Ph-OH	OC(C=C1)=CC=C1C2=CC(N3C4=C5C=C(C(C)(C)C)C=C4C6=CC(C(C)(C)C)=CC=C36)=C(B5C(C=C(C(C)(C)C)C=C78)=C7N9C%10=C8C=C(C(C)(C)C)C=C%10)C9=C2
BN-Ph-N(CH3)2	CC(C1=CC2=C(C3=C1)N(C4=CC=C(C(C)(C)C)C=C43)C5=C(B2C(C=C(C(C)(C)C)C=C67)=C6N8C9=C7C=C(C(C)(C)C)C=C9)C8=CC(C%10=CC=C(N(C)C)C=C%10)=C5)(C)C
Tip-DtCzB	CC(C)C(C=C(C(C)C)C=C1C(C)C)=C1C2=CC(N3C4=C5C=C(C(C)(C)C)C=C4C6=CC(C(C)(C)C)=CC=C36)=C(B5C(C=C(C(C)(C)C)C=C78)=C7N9C%10=C8C=C(C(C)(C)C)C=C%10)C9=C2
tDPA-DtCzB	CC(C1=CC2=C(C3=C1)N(C4=CC=C(C(C)(C)C)C=C43)C5=C(B2C(C=C(C(C)(C)C)C=C67)=C6N8C9=C7C=C(C(C)(C)C)C=C9)C8=CC(N(C%10=CC=C(C(C)(C)C)C=C%10)C%11=CC=C(C(C)(C)C)C=C%11)=C5)(C)C
BN-Ac	CC(C1=C2C=CC=C1)(C)C3=C(C=CC=C3)N2C4=CC(N5C6=C7C=C(C(C)(C)C)C=C6C8=CC(C(C)(C)C)=CC=C58)=C(B7C(C=C(C(C)(C)C)C=C9%10)=C9N%11C%12=C%10C=C(C(C)(C)C)C=C%12)C%11=C4
BN-PXZ	CC(C1=CC2=C(C3=C1)N(C4=CC=C(C(C)(C)C)C=C43)C5=C(B2C(C=C(C(C)(C)C)C=C67)=C6N8C9=C7C=C(C(C)(C)C)C=C9)C8=CC(N%10C(C=CC=C%11)=C%11OC%12=C%10C=CC=C%12)=C5)(C)C
BN-PZ	CC(C1=CC2=C(C3=C1)N(C4=CC=C(C(C)(C)C)C=C43)C5=C(B2C(C=C(C(C)(C)C)C=C67)=C6N8C9=C7C=C(C(C)(C)C)C=C9)C8=CC(N%10C(C=CC=C%11)=C%11N(C%12=CC=C(C(C)(C)C)C=C%12)C%13=C%10C=CC=C%13)=C5)(C)C
p-I-PCzBN	CC(C1=CC2=C(C3=C1)N(C4=CC=C(C(C)(C)C)C=C43)C5=C(B2C(C=C(C(C)(C)C)C=C67)=C6N8C9=C7C=C(C(C)(C)C)C=C9)C8=CC(C%10=CC=CC%11=C%10N(C%12=CC=CC=C%12)C%13=C%11C=CC=C%13)=C5)(C)C
m-I-PCzBN	CC(C1=CC2=C(C3=C1)N(C4=CC=C(C(C)(C)C)C=C43)C5=C(B2C(C=C(C(C)(C)C)C=C67)=C6N8C9=C7C=C(C(C)(C)C)C=C9)C8=CC=C5C%10=C(N(C%11=CC=CC=C%11)C%12=C%13C=CC=C%12)C%13=CC=C%10)(C)C
BN(p)SCH3	CSC1=CC(N2C3=C4C=C(C(C)(C)C)C=C3C5=CC(C(C)(C)C)=CC=C25)=C(B4C(C=C(C(C)(C)C)C=C67)=C6N8C9=C7C=C(C(C)(C)C)C=C9)C8=C1
CzBNCz	C12=CC(N3C(C=CC=C4)=C4C5=C3C=CC=C5)=CC(N6C7=C8C=CC=C7C9=CC=CC=C69)=C1B8C(C=CC=C%10%11)=C%10N2C%12=C%11C=CC=C%12
TCz-BN	CC(C1=CC2=C(C3=C1)N(C4=CC=C(C(C)(C)C)C=C43)C5=C(B2C(C=C(C(C)(C)C)C=C67)=C6N8C9=C7C=C(C(C)(C)C)C=C9)C8=CC(N%10C(C=CC(C(C)(C)C)=C%11)=C%11C%12=C%10C=CC(C(C)(C)C)=C%12)=C5)(C)C
m-Cz-BBNCz	CC(C1=CC2=C(C3=C1)N(C4=CC=C(C(C)(C)C)C=C43)C5=C(B62)C(N7C8=C6C=C(C(C)(C)C)C=C8C9=C7C=CC(C(C)(C)C)=C9)=CC=C5N%10C(C=CC(C(C)(C)C)=C%11)=C%11C%12=C%10C=CC(C(C)(C)C)=C%12)(C)C
CzBNNa	C12=CC(C3=CC=C(C=CC=C4)C4=C3)=CC(N5C6=C7C=CC=C6C8=CC=CC=C58)=C1B7C(C=CC=C9%10)=C9N2C%11=C%10C=CC=C%11
CzBNPyr	C12=CC(C3=CC=C(C=C4)C5=C3C=CC6=CC=CC4=C56)=CC(N7C8=C9C=CC=C8C%10=CC=CC=C7%10)=C1B9C(C=CC=C%11%12)=C%11N2C%13=C%12C=CC=C%13
p-TBNCz	CC(C1=CC(N2C3=C4C=C(C(C)(C)C)C=C3C5=CC(C(C)(C)C)=CC=C25)=C(B4C(C=C(C(C)(C)C)C=C67)=C6N8C9=C7C=C(C(C)(C)C)C=C9)C8=C1)(C)C
BNCz-Br	BrC1=CC(N2C3=C4C=C(C(C)(C)C)C=C3C5=CC(C(C)(C)C)=CC=C25)=C(B4C(C=C(C(C)(C)C)C=C67)=C6N8C9=C7C=C(C(C)(C)C)C=C9)C8=C1
4	BrC1=CC(N2C3=C4C=C(C(C)(C)C)C=C3C5=CC(C(C)(C)C)=CC=C25)=C(B4C(C=C(C(C)(C)C)C=C67)=C6N8C9=C7C=C(C(C)(C)C)C=C9)C8=C1
BNCz-Br-Cz2	BrC1=C(N2C(C=CC(C(C)(C)C)=C3)=C3C4=C2C=CC(C(C)(C)C)=C4)C(N5C6=C7C=C(C(C)(C)C)C=C6C8=CC(C(C)(C)C)=CC=C58)=C(B7C(C=C(C(C)(C)C)C=C9%10)=C9N%11C%12=C%10C=C(C(C)(C)C)C=C%12)C%11=C1N%13C(C=CC(C(C)(C)C)=C%14)=C%14C%15=C%13C=CC(C(C)(C)C)=C%15
3	BrC1=C(N2C(C=CC(C(C)(C)C)=C3)=C3C4=C2C=CC(C(C)(C)C)=C4)C(N5C6=C7C=C(C(C)(C)C)C=C6C8=CC(C(C)(C)C)=CC=C58)=C(B7C(C=C(C(C)(C)C)C=C9%10)=C9N%11C%12=C%10C=C(C(C)(C)C)C=C%12)C%11=C1N%13C(C=CC(C(C)(C)C)=C%14)=C%14C%15=C%13C=CC(C(C)(C)C)=C%15
BNCz-Br	BrC1=CC(N2C3=C4C=C(C(C)(C)C)C=C3C5=CC(C(C)(C)C)=CC=C25)=C(B4C(C=C(C(C)(C)C)C=C67)=C6N8C9=C7C=C(C(C)(C)C)C=C9)C8=C1
2	BrC1=CC(N2C3=C4C=C(C(C)(C)C)C=C3C5=CC(C(C)(C)C)=CC=C25)=C(B4C(C=C(C(C)(C)C)C=C67)=C6N8C9=C7C=C(C(C)(C)C)C=C9)C8=C1
BCZ-BN-Br	BrC1=CC(N2C3=C4C=C(C(C)(C)C)C=C3C5=CC(C(C)(C)C)=CC=C25)=C(B4C(C=C(C(C)(C)C)C=C67)=C6N8C9=C7C=C(C(C)(C)C)C=C9)C8=C1
DPACzBN1	C12=CC=CC(N(C3=CC=CC=C3)C4=C5C=CC=C4)=C1B5C(C=CC=C67)=C6N2C8=C7C=CC=C8
PTZBN1	C12=CC=CC(N(C3=CC=CC=C3)C4=C5C=CC=C4)=C1B5C(C=CC=C6S7)=C6N2C8=C7C=CC=C8
DMAcBNO	CC1(C)C2=CC=CC3=C2N(C4=CC=CC=C41)C5=C(B3C(C=C(C(C)(C)C)C=C6)=C6O7)C7=CC=C5
DPAcBNO	CC(C(C=C1)=CC2=C1OC3=CC=CC4=C3B2C5=C6N4C7=CC=CC=C7C(C8=CC=CC=C8)(C9=CC=CC=C9)C6=CC=C5)(C)C
Cz-PTZ-BN	CC(C(C=C1C2=C3C=CC(C(C)(C)C)=C2)=CC4=C1N3C5=CC=CC6=C5B4C7=C8N6C9=CC=CC=C9SC8=CC=C7)(C)C
BNCzPTZ	CC(C(C=C1C2=C3C=CC(C(C)(C)C)=C2)=CC4=C1N3C5=CC=CC6=C5B4C7=C8N6C9=CC=CC=C9SC8=CC=C7)(C)C
BNCzPXZ	CC(C(C=C1C2=C3C=CC(C(C)(C)C)=C2)=CC4=C1N3C5=CC=CC6=C5B4C7=C8N6C9=CC=CC=C9OC8=CC=C7)(C)C
2Cz-PTZ-BN	CC(C(C=C1C2=C3C=CC(C(C)(C)C)=C2)=CC4=C1N3C5=CC(N6C(C=CC(C(C)(C)C)=C7)=C7C8=C6C=CC(C(C)(C)C)=C8)=CC9=C5B4C%10=C%11N9C%12=CC=CC=C%12SC%11=CC=C%10)(C)C
BN-MeIAc	CC1(C2=C3C=CC=C2)C4=C(C=CC5=C4N3C6=CC=CC7=C6B5C8=C9C(C%10=CC(C(C)(C)C)=CC=C%10N97)=CC(C(C)(C)C)=C8)C%11=C1C=CC=C%11
BN-Se	CC(C(C=C1)=CC2=C1N3C4=C(C=C(C(C)(C)C)C=C42)B5C6=C(N7C8=C5C=CC=C8[Se]C9=CC=CC=C79)C=CC=C63)(C)C
BNIP-tBuCz	CC(C1=CC(N2C3=C(C=CC=C3N4C5=CC=C(C(C)(C)C)C=C56)B7C8=C(N9C%10=C7C=C(C(C)(C)C)C=C%10C%11=CC(C(C)(C)C)=CC=C9%11)C=CC=C82)=C4C6=C1)(C)C
BNIP-CzDPA	CC(C1=CC(N2C3=C(C=CC=C3N4C5=CC=C(C(C)(C)C)C=C56)B7C8=C(N9C%10=C7C=C(N(C%11=CC=CC=C%11)C%12=CC=CC=C%12)C=C%10C%13=CC(N(C%14=CC=CC=C%14)C%15=CC=CC=C%15)=CC=C9%13)C=CC=C82)=C4C6=C1)(C)C
Br-DBA	BrC1=CC(OC2=C3C=CC=C2)=C(B3C(C=CC=C4)=C4O5)C5=C1
B-O-dpa	CC(C1=CC(N(C2=CC=CC=C2B34)C5=CC=CC=C5)=C3C(OC6=C4C=CC=C6)=C1)(C)C
B-O-Cz	CC(C1=CC(N2C3=CC=CC=C3C4=C2C5=CC=C4)=C(B65)C(OC7=C6C=CC=C7)=C1)(C)C
B-O-dmAc	CC1(C)C2=CC=CC=C2N(C3=C1C=CC=C3B45)C6=C4C(OC7=C5C=CC=C7)=CC(C(C)(C)C)=C6
B-O-dpAc	CC(C1=CC(N2C3=CC=CC=C3C(C4=CC=CC=C4)(C5=CC=CC=C5)C6=C2C7=CC=C6)=C(B87)C(OC9=C8C=CC=C9)=C1)(C)C
B-dpa-Cz	CC(C1=CC(N(C2=CC=CC=C23)C4=C3C=CC=C4B56)=C5C(N(C7=CC=CC=C7)C8=C6C=CC=C8)=C1)(C)C
B-dpa-dmAc	CC1(C)C2=CC=CC=C2N(C3=C1C=CC=C3B45)C6=C4C(N(C7=CC=CC=C7)C8=C5C=CC=C8)=CC(C(C)(C)C)=C6
B-dpa-spiroAc	CC(C1=CC(N2C3=CC=CC=C3C4(C5=CC=CC=C5C6=C4C=CC=C6)C7=C2C8=CC=C7)=C(B98)C(N(C%10=CC=CC=C%10)C%11=C9C=CC=C%11)=C1)(C)C
ADBNA-Me-Mes	CC(C=C1B2C3=C(C)C=C(C)C=C3C)=CC(B4C5=C(C)C=C(C)C=C5C)=C1N(C6=C2C=C(C)C=C6)C7=C4C=C(C)C=C7
ADBNA-Me-Tip	CC(C=C1B2C3=C(C(C)C)C=C(C(C)C)C=C3C(C)C)=CC(B4C5=C(C(C)C)C=C(C(C)C)C=C5C(C)C)=C1N(C6=C2C=C(C)C=C6)C7=C4C=C(C)C=C7
3	CC(C=C1B2C3=C(C)C=C(C)C=C3C)=CC(B4C5=C(C)C=C(C)C=C5C)=C1N(C6=C2C=C(C)C=C6)C7=C4C=C(C)C=C7
ADBNA-Me-Mes-MesF	CC(C=C1B2C3=C(C(F)(F)F)C=C(C(F)(F)F)C=C3C(F)(F)F)=CC(B4C5=C(C)C=C(C)C=C5C)=C1N(C6=C2C=C(C)C=C6)C7=C4C=C(C)C=C7
4a	CC(C=C1B2C3=C(C(F)(F)F)C=C(C(F)(F)F)C=C3C(F)(F)F)=CC(B4C5=C(C)C=C(C)C=C5C)=C1N(C6=C2C=C(C)C=C6)C7=C4C=C(C)C=C7
ADBNA-Me-Mes-CzAr	CC(C=C1B2C3=C(C)C=C(N4C(C=CC=C5)=C5C6=C4C=CC=C6)C=C3C)=CC(B7C8=C(C)C=C(C)C=C8C)=C1N(C9=C2C=C(C)C=C9)C%10=C7C=C(C)C=C%10
4b	CC(C=C1B2C3=C(C)C=C(N4C(C=CC=C5)=C5C6=C4C=CC=C6)C=C3C)=CC(B7C8=C(C)C=C(C)C=C8C)=C1N(C9=C2C=C(C)C=C9)C%10=C7C=C(C)C=C%10
ADBNA-Me-Mes-Me4N	CC(C=C1B2C3=C(C)C=C(N(C)C)C=C3C)=CC(B4C5=C(C)C=C(C)C=C5C)=C1N(C6=C2C=C(C)C=C6)C7=C4C=C(C)C=C7
4c	CC(C=C1B2C3=C(C)C=C(N(C)C)C=C3C)=CC(B4C5=C(C)C=C(C)C=C5C)=C1N(C6=C2C=C(C)C=C6)C7=C4C=C(C)C=C7
ADBNA-Me-MesF	CC(C=C1B2C3=C(C(F)(F)F)C=C(C(F)(F)F)C=C3C(F)(F)F)=CC(B4C5=C(C(F)(F)F)C=C(C(F)(F)F)C=C5C(F)(F)F)=C1N(C6=C2C=C(C)C=C6)C7=C4C=C(C)C=C7
6a	CC(C=C1B2C3=C(C(F)(F)F)C=C(C(F)(F)F)C=C3C(F)(F)F)=CC(B4C5=C(C(F)(F)F)C=C(C(F)(F)F)C=C5C(F)(F)F)=C1N(C6=C2C=C(C)C=C6)C7=C4C=C(C)C=C7
ADBNA-Me-Me4N	CC(C=C1B2C3=C(C)C=C(N(C)C)C=C3C)=CC(B4C5=C(C)C=C(N(C)C)C=C5C)=C1N(C6=C2C=C(C)C=C6)C7=C4C=C(C)C=C7
6c	CC(C=C1B2C3=C(C)C=C(N(C)C)C=C3C)=CC(B4C5=C(C)C=C(N(C)C)C=C5C)=C1N(C6=C2C=C(C)C=C6)C7=C4C=C(C)C=C7
ADBNA-Me-CzAr	CC(C=C1B2C3=C(C)C=C(N4C(C=CC=C5)=C5C6=C4C=CC=C6)C=C3C)=CC(B7C8=C(C)C=C(N9C(C=CC=C%10)=C%10C%11=C9C=CC=C%11)C=C8C)=C1N(C%12=C2C=C(C)C=C%12)C%13=C7C=C(C)C=C%13
6b	CC(C=C1B2C3=C(C)C=C(N4C(C=CC=C5)=C5C6=C4C=CC=C6)C=C3C)=CC(B7C8=C(C)C=C(N9C(C=CC=C%10)=C%10C%11=C9C=CC=C%11)C=C8C)=C1N(C%12=C2C=C(C)C=C%12)C%13=C7C=C(C)C=C%13
BBCz-R	CC(C1=CC=C2N(C3=C4C=C(C(C)(C)C)C=C3C2=C1)C5=CC=CC6=C5B4C7=C(N6C8=C9C=C(C(C)(C)C)C=C8)C9=C%10C%11=C7C(C=C(C(C)(C)C)C=C%12)=C%12N%11C%13=C%14B%10C%15=C(C%16=CC(C(C)(C)C)=C%15)N(C%17=CC=C(C(C)(C)C)C=C%17%16)C%14=CC=C%13)(C)C
Me2AcBO	CC(C1=CC=C(OC2=CC=CC3=C2B4C5=C(C=C(N6C(C=CC=C7)=C7C(C)(C)C8=C6C=CC=C8)C=C5)O3)C4=C1)(C)C9=CC%10=C(C=C9)OC%11=CC=CC%12=C%11B%10C%13=CC=C(N%14C(C=CC=C%15)=C%15C(C)(C)C%16=C%14C=CC=C%16)C=C%13O%12
F2AcBO	CC(C1=C2C=CC=C1)(C)C3=C(C=CC=C3)N2C4=CC=C5C(OC6=C7B5C8=C(C=CC(C9(C(C=CC=C%10)=C%10C%11=C9C=CC=C%11)C%12=CC=C(OC%13=CC=CC%14=C%13B%15C%16=C(C=C(N%17C(C=CC=C%18)=C%18C(C)(C)C%19=C%17C=CC=C%19)C=C%16)O%14)C%15=C%12)=C8)OC7=CC=C6)=C4
DBN-ICz	CC(C1=CC=C2N(C3=C4C=C(C(C)(C)C)C=C3C2=C1)C5=C(B64)C(N7C8=C6C=CC=C8C9=C7C=C%10C%11=C9B(C(C=C(C(C)(C)C)C=C%12%13)=C%12N%14C%15=C%13C=C(C(C)(C)C)C=C%15)C(C%14=CC=C%16)=C%16N%11C%17=CC=CC=C%17%10)=CC=C5)(C)C
m-DINBO	CC1=C(OC2=C3B4C5=C(C6=CC(C(C)(C)C)=C5)N(C7=CC=C(C(C)(C)C)C=C76)C3=CC=C2)C4=CC8=C1OC9=CC=CC%10=C9B8C(C=C(C(C)(C)C)C=C%11%12)=C%11N%10C%13=C%12C=C(C(C)(C)C)C=C%13
SBON	CC(C1=CC=C(C2=C1)N(C3=CC=C(C(C)(C)C)C=C32)C4=CC(OC5=CC=C(OC6=C7B8C9=C(C%10=CC(C(C)(C)C)=C9)N(C%11=CC=C(C(C)(C)C)C=C%11%10)C7=CC=C6)C8=C5)=CC=C4)(C)C
DBON	CC(C1=CC2=C(C3=C1)N(C4=CC=C(C(C)(C)C)C=C43)C5=C(B2C(C=C(OC6=C7B8C9=C(C%10=CC(C(C)(C)C)=C9)N(C%11=CC=C(C(C)(C)C)C=C%11%10)C7=CC=C6)C8=C%12)=C%12O%13)C%13=CC=C5)(C)C
SBSN	CC(C1=CC=C(C2=C1)N(C3=CC=C(C(C)(C)C)C=C32)C4=CC(SC5=CC=C(SC6=C7B8C9=C(C%10=CC(C(C)(C)C)=C9)N(C%11=CC=C(C(C)(C)C)C=C%11%10)C7=CC=C6)C8=C5)=CC=C4)(C)C
DBSN	CC(C1=CC2=C(C3=C1)N(C4=CC=C(C(C)(C)C)C=C43)C5=C(B2C(C=C(SC6=C7B8C9=C(C%10=CC(C(C)(C)C)=C9)N(C%11=CC=C(C(C)(C)C)C=C%11%10)C7=CC=C6)C8=C%12)=C%12S%13)C%13=CC=C5)(C)C
DBNO	CC(C(C=C1C2=C3C=CC(C(C)(C)C)=C2)=CC4=C1N3C5=CC=CC6=C5B4C7=C(O6)C=C8C(OC9=CC=CC%10=C9B8C(C=C(C(C)(C)C)C=C%11%12)=C%11N%10C%13=C%12C=C(C(C)(C)C)C=C%13)=C7)(C)C
p-DINBO	CC(C1=CC2=C(C3=C1)N(C4=CC=C(C(C)(C)C)C=C43)C5=C(B62)C(OC7=C6C=C(OC8=C9B%10C%11=C(C%12=CC(C(C)(C)C)=C%11)N(C%13=CC=C(C(C)(C)C)C=C%13%12)C9=CC=C8)C%10=C7)=CC=C5)(C)C
R-BN	C12=C3C(B4C5=CC=CC6=C5N3C7=C6C=CC=C7)=C(N8C(C4=CC=C9)=C9C%10=C8C=CC=C%10)C(N%11C(C=CC=C%12)=C%12C%13=C%11C%14=CC=C%13)=C1B%14C%15=CC=CC%16=C%15N2C%17=C%16C=CC=C%17
1a	C12=C3C(B4C5=CC=CC6=C5N3C7=C6C=CC=C7)=C(N8C(C4=CC=C9)=C9C%10=C8C=CC=C%10)C(N%11C(C=CC=C%12)=C%12C%13=C%11C%14=CC=C%13)=C1B%14C%15=CC=CC%16=C%15N2C%17=C%16C=CC=C%17
R-TBN	CC(C(C=C1)=CC2=C1N(C3=C2C=C(C(C)(C)C)C=C34)C5=C(B4C6=CC(C(C)(C)C)=CC7=C6N8C9=C7C=C(C(C)(C)C)C=C9)C8=C%10C(B%11C%12=CC(C(C)(C)C)=CC%13=C%12N%10C%14=C%13C=C(C(C)(C)C)C=C%14)=C5N%15C(C=CC(C(C)(C)C)=C%16)=C%16C%17=C%15C%11=CC(C(C)(C)C)=C%17)(C)C
1b	CC(C(C=C1)=CC2=C1N(C3=C2C=C(C(C)(C)C)C=C34)C5=C(B4C6=CC(C(C)(C)C)=CC7=C6N8C9=C7C=C(C(C)(C)C)C=C9)C8=C%10C(B%11C%12=CC(C(C)(C)C)=CC%13=C%12N%10C%14=C%13C=C(C(C)(C)C)C=C%14)=C5N%15C(C=CC(C(C)(C)C)=C%16)=C%16C%17=C%15C%11=CC(C(C)(C)C)=C%17)(C)C
R-TPhBN	CC(C(C=C1)=CC=C1C2=CC(C3=C4C=CC(C5=CC=C(C(C)(C)C)C=C5)=C3)=C6N4C(C(N7C(C=CC(C8=CC=C(C(C)(C)C)C=C8)=C9)=C9C%10=C7C%11=CC(C%12=CC=C(C(C)(C)C)C=C%12)=C%10)=C(B%11C%13=CC(C%14=CC=C(C(C)(C)C)C=C%14)=CC%15=C%13N%16C%17=C%15C=C(C%18=CC=C(C(C)(C)C)C=C%18)C=C%17)C%16=C%19N%20C(C%21=CC(C%22=CC=C(C(C)(C)C)C=C%22)=C%23)=C%23C%24=C%20C=CC(C%25=CC=C(C(C)(C)C)C=C%25)=C%24)=C%19B%21C6=C2)(C)C
1c	CC(C(C=C1)=CC=C1C2=CC(C3=C4C=CC(C5=CC=C(C(C)(C)C)C=C5)=C3)=C6N4C(C(N7C(C=CC(C8=CC=C(C(C)(C)C)C=C8)=C9)=C9C%10=C7C%11=CC(C%12=CC=C(C(C)(C)C)C=C%12)=C%10)=C(B%11C%13=CC(C%14=CC=C(C(C)(C)C)C=C%14)=CC%15=C%13N%16C%17=C%15C=C(C%18=CC=C(C(C)(C)C)C=C%18)C=C%17)C%16=C%19N%20C(C%21=CC(C%22=CC=C(C(C)(C)C)C=C%22)=C%23)=C%23C%24=C%20C=CC(C%25=CC=C(C(C)(C)C)C=C%25)=C%24)=C%19B%21C6=C2)(C)C
BNO1	CC(C(C=C1)=CC2=C1OC3=C(N4C5=C6C=C(C(C)(C)C)C=C5C7=CC(C(C)(C)C)=CC=C47)C(B6C(C=C(C(C)(C)C)C=C8)=C8O9)=C9C(N%10C%11=CC=C(C(C)(C)C)C=C%11%12)=C3B2C%13=C%10C%12=CC(C(C)(C)C)=C%13)(C)C
BNO2	CC1(C)C2=C(C=CC=C2)C(C1=C3)=CC4=C3OC5=C(B4C6=C7C8=CC(C(C)(C)C)=C6)C(N7C9=CC=C(C(C)(C)C)C=C98)=C%10C%11=C5N(C%12=CC=C(C(C)(C)C)C=C%12%13)C(C%13=CC(C(C)(C)C)=C%14)=C%14B%11C(C=C(C(C=CC=C%15)=C%15C%16(C)C)C%16=C%17)=C%17O%10
BNO3	CC(C1=CC(B2C3=C(OC4=C2C=C(OC5=CC=CC=C5)C=C4)C(N(C6=CC=C(C(C)(C)C)C=C67)C(C7=CC(C(C)(C)C)=C8)=C8B9C(C=C(OC%10=CC=CC=C%10)C=C%11)=C%11O%12)=C9C%12=C3N%13C%14=CC=C(C(C)(C)C)C=C%14%15)=C%13C%15=C1)(C)C
DBNS	C1(SC2=CC=CC=C2B3C(C=CC=C45)=C4N6C7=C5C=CC=C7)=C3C6=C8C9=C1N(C%10=C%11C=CC=C%10)C%12=C(C=CC=C%12%11)B9C%13=CC=CC=C%13S8
DBNS-tBu	CC(C(C=C12)=CC3=C1N(C4=C2C=C(C(C)(C)C)C=C4)C5=C(B3C6=CC=CC=C6S7)C7=C8C9=C5SC%10=CC=CC=C%10B9C(C=C(C(C)(C)C)C=C%11%12)=C%11N8C%13=C%12C=C(C(C)(C)C)C=C%13)(C)C
BNS	C1(N2C3=C4C5=C(N6C(C(B5C7=CC(C=CC=C8)=C8C9=C7N4C%10=C9C(C=CC=C%11)=C%11C=C%10)=CC%12=C%13C=CC=C%12)=C%13C%14=C6C=CC%15=C%14C=CC=C%15)C(N%16C(C=CC%17=C%18C=CC=C%17)=C%18C%19=C%16C%20=CC%21=C%19C=CC=C%21)=C3B%20C%22=CC%23=C(C=CC=C%23)C%24=C2%22)=C%24C%25=C(C=CC=C%25)C=C1
BNNO	CC(C(C=C1)=CC2=C1OC3=C(B2C4=C5N6C7=CC=CC=C7C5=C(C(C=CC=C8)=C8N9C%10=CC=CC=C%10)C9=C4)C6=C%11C%12=C3N(C%13=CC=CC=C%13%14)C(C%14=C(C(C=CC=C%15)=C%15N%16C%17=CC=CC=C%17)C%16=C%18)=C%18B%12C(C=C(C(C)(C)C)C=C%19)=C%19O%11)(C)C
BBCz-DB	CC(C(C=C1)=CC2=C1N3C4=C2C=C(C(C)(C)C)C=C4B5C6=C3C=C(N(C7=CC=C(C(C)(C)C)C=C78)C(C8=CC(C(C)(C)C)=C9)=C9B%10%11)C%10=C6N%12C%13=C5C=C(C(C)(C)C)C=C%13C%14=CC(C(C)(C)C)=CC%11=C%12%14)(C)C
BSBS-N1	CC(C(C=C1)=CC2=C1N(C3=CC=C(C(C)(C)C)C=C34)C5=C(B2C6=CC(C(C)(C)C)=CC=C6S7)C7=CC8=C5B4C(C=C(C(C)(C)C)C=C9)=C9S8)(C)C
DBTN-2	CC(C1=CC2=C(C3=C1)N(C4=C3C=C(C(C)(C)C)C=C4)C5=CC=CC6=C5B2C7=C8N6C9=C(C=C(C(C)(C)C)C=C9)B(C%10=C%11C%12=CC(C(C)(C)C)=C%10)C8=C(N%11C%13=C%12C=C(C(C)(C)C)C=C%13)C=C7)(C)C
m-DBCz	CC(C1=CC(N(C2=CC(C(C)(C)C)=C3)C4=C5C=C(C(C)(C)C)C=C4B6C2=C3N7C8=C6C=C(C(C)(C)C)C=C8C9=CC(C(C)(C)C)=CC=C79)=C(B5C(C=C(C(C)(C)C)C=C%10%11)=C%10N%12C%13=C%11C=C(C(C)(C)C)C=C%13)C%12=C1)(C)C
BOBO-Z	C1(B2C(C=CC=C3)=C3N(C4=CC=CC=C4)C5=CC(N(C6=CC=CC=C6)C7=CC=CC=C7)=CC8=C52)=C(O8)C=C(O9)C(B%10C%11=CC=CC=C%11N(C%12=CC=CC=C%12)C%13=C%10C9=CC(N(C%14=CC=CC=C%14)C%15=CC=CC=C%15)=C%13)=C1
BOBS-Z	C1(B2C(C=CC=C3)=C3N(C4=CC=CC=C4)C5=CC(N(C6=CC=CC=C6)C7=CC=CC=C7)=CC8=C52)=C(O8)C=C(S9)C(B%10C%11=CC=CC=C%11N(C%12=CC=CC=C%12)C%13=C%10C9=CC(N(C%14=CC=CC=C%14)C%15=CC=CC=C%15)=C%13)=C1
BSBS-Z	C1(B2C(C=CC=C3)=C3N(C4=CC=CC=C4)C5=CC(N(C6=CC=CC=C6)C7=CC=CC=C7)=CC8=C52)=C(S8)C=C(S9)C(B%10C%11=CC=CC=C%11N(C%12=CC=CC=C%12)C%13=C%10C9=CC(N(C%14=CC=CC=C%14)C%15=CC=CC=C%15)=C%13)=C1
pTBNCz	CC(C1=CC(N2C3=C4C=C(C(C)(C)C)C=C3C5=CC(C(C)(C)C)=CC=C25)=C(B4C(C=C(C(C)(C)C)C=C67)=C6N8C9=C7C=C(C(C)(C)C)C=C9)C8=C1)(C)C
m-DBCz	CC(C1=CC(N(C2=CC(C(C)(C)C)=C3)C4=C5C=C(C(C)(C)C)C=C4B6C2=C3N7C8=C6C=C(C(C)(C)C)C=C8C9=CC(C(C)(C)C)=CC=C79)=C(B5C(C=C(C(C)(C)C)C=C%10%11)=C%10N%12C%13=C%11C=C(C(C)(C)C)C=C%13)C%12=C1)(C)C
TMInBN	CC1=C(C)C2=CC=CC3=C2N1C4=CC=CC5=C4B3C6=C7N5C(C)=C(C)C7=CC=C6
Mes-InBN	CC1=C(C)C2=CC=CC3=C2N1C4=CC(C5=C(C)C=C(C)C=C5C)=CC6=C4B3C7=C8N6C(C)=C(C)C8=CC=C7
Cz-InBN	CC1=C(C)C2=CC=CC3=C2N1C4=CC(N5C(C=CC=C6)=C6C7=C5C=CC=C7)=CC8=C4B3C9=C%10N8C(C)=C(C)C%10=CC=C9
TCz-InBN	CC1=C(C)C2=CC=CC3=C2N1C4=CC(N5C(C=CC(C(C)(C)C)=C6)=C6C7=C5C=CC(C(C)(C)C)=C7)=CC8=C4B3C9=C%10N8C(C)=C(C)C%10=CC=C9
Br-Cz-BSN	BrC1=CC(N2C3=C4C=C(C(C)(C)C)C=C3C5=CC(C(C)(C)C)=CC=C25)=C(B4C(C=CC=C6)=C6S7)C7=C1
Cz-BSeN-Br	BrC1=CC([Se]C2=C3C=CC=C2)=C(B3C(C=C(C(C)(C)C)C=C45)=C4N6C7=C5C=C(C(C)(C)C)C=C7)C6=C1
AZA-BN	CCCCC1=NC2=C3C(B4C(C=C(C(C)(C)C)C=C56)=C5N3C7=C6C=C(C(C)(C)C)C=C7)=C(N8C9=C4C=C(C(C)(C)C)C=C9C%10=CC(C(C)(C)C)=CC=C8%10)C=C2C%11=C1C=CC=C%11
DBCz-Mes	CC(C=C(C)C=C1C)=C1B2C3=CC(C(C)(C)C)=CC4=C3N5C6=C(C=C(C(C)(C)C)C=C64)B7C8=C(N9C%10=C7C=C(C(C)(C)C)C=C%10C%11=CC(C(C)(C)C)=CC=C9%11)C=CC2=C85
BBCz-Y	CC(C1=CC2=C(C3=C1)N(C4=CC=C(C(C)(C)C)C=C43)C5=C(B2C(C=C(C(C)(C)C)C=C67)=C6N8C9=C7C=C(C(C)(C)C)C=C9)C8=C(N%10C(C=CC(C(C)(C)C)=C%11)=C%11C%12=C%10C=CC(C(C)(C)C)=C%12)C=C5N%13C(C=CC(C(C)(C)C)=C%14)=C%14C%15=C%13C=CC(C(C)(C)C)=C%15)(C)C
BN-2Cz	CC(C1=CC2=C(C3=C1)N(C4=CC=C(C(C)(C)C)C=C43)C5=C(B2C(C=C(C(C)(C)C)C=C67)=C6N8C9=C7C=C(C(C)(C)C)C=C9)C8=C(N%10C(C=CC(C(C)(C)C)=C%11)=C%11C%12=C%10C=CC(C(C)(C)C)=C%12)C=C5N%13C(C=CC(C(C)(C)C)=C%14)=C%14C%15=C%13C=CC(C(C)(C)C)=C%15)(C)C
BN-2Cz	C12=C(N3C(C=CC=C4)=C4C5=C3C=CC=C5)C=C(N6C(C=CC=C7)=C7C8=C6C=CC=C8)C(N9C%10=C%11C=CC=C%10C%12=CC=CC=C9%12)=C1B%11C(C=CC=C%13%14)=C%13N2C%15=C%14C=CC=C%15
TPh-BNCz	CC(C1=CC2=C(C3=C1)N(C4=CC=C(C(C)(C)C)C=C43)C5=C(B2C(C=C(C(C)(C)C)C=C67)=C6N8C9=C7C=C(C(C)(C)C)C=C9)C8=C(C%10=CC(C%11=CC=CC=C%11)=CC(C%12=CC=CC=C%12)=C%10)C=C5C%13=CC(C%14=CC=CC=C%14)=CC(C%15=CC=CC=C%15)=C%13)(C)C
TRZCzPh-BNCz	CC(C1=CC2=C(C3=C1)N(C4=CC=C(C(C)(C)C)C=C43)C5=C(B2C(C=C(C(C)(C)C)C=C67)=C6N8C9=C7C=C(C(C)(C)C)C=C9)C8=C(C%10=CC=C(N%11C(C=CC=C%12)=C%12C%13=C%11C=CC=C%13)C=C%10)C(C%14=NC(C%15=CC=CC=C%15)=NC(C%16=CC=CC=C%16)=N%14)=C5C%17=CC=C(N%18C(C=CC=C%19)=C%19C%20=C%18C=CC=C%20)C=C%17)(C)C
TRZTPh-BNCz	CC(C1=CC2=C(C3=C1)N(C4=CC=C(C(C)(C)C)C=C43)C5=C(B2C(C=C(C(C)(C)C)C=C67)=C6N8C9=C7C=C(C(C)(C)C)C=C9)C8=C(C%10=CC(C%11=CC=CC=C%11)=CC(C%12=CC=CC=C%12)=C%10)C(C%13=NC(C%14=CC=CC=C%14)=NC(C%15=CC=CC=C%15)=N%13)=C5C%16=CC(C%17=CC=CC=C%17)=CC(C%18=CC=CC=C%18)=C%16)(C)C
BBCz-G	CC(C1=CC2=C(C3=C1)N(C4=CC=C(C(C)(C)C)C=C43)C5=C(B2C(C=C(C(C)(C)C)C=C67)=C6N8C9=C7C=C(C(C)(C)C)C=C9)C8=C(N%10C(C=CC(C(C)(C)C)=C%11)=C%11C%12=C%10C=CC(C(C)(C)C)=C%12)C(N%13C(C=CC(C(C)(C)C)=C%14)=C%14C%15=C%13C=CC(C(C)(C)C)=C%15)=C5N%16C(C=CC(C(C)(C)C)=C%17)=C%17C%18=C%16C=CC(C(C)(C)C)=C%18)(C)C
NBNP	CC(C1=CC2=C(C3=C1)N(C4=CC=C(C(C)(C)C)C=C43)C5=C(B2C(C=C(C(C)(C)C)C=C67)=C6N8C9=C7C=C(C(C)(C)C)C=C9)C8=C(C(C=CC=C%10)=C%10N%11C%12=CC=CC=C%12)C%11=C5)(C)C
VTCzBN	CC(C)(C)C1=CC=C2N(C3=C4C=C(C(C)(C)C)C=C3C2=C1)C5=C(B4C(C=C(C(C)(C)C)C=C67)=C6N8C9=C7C=C(C(C)(C)C)C=C9)C8=C%10C%11=C5C%12=CC=CC=C%12N%11C%13=C%10C=CC=C%13
TCz-VTCzBN	C12=C3C(N(C4=CC=CC=C45)C6=C3C=CC=C6)=C5C(N7C8=C9C=C(N%10C(C=CC=C%11)=C%11C%12=C%10C=CC=C%12)C=C8C%13=CC(N%14C(C=CC=C%15)=C%15C%16=C%14C=CC=C%16)=CC=C7%13)=C1B9C(C=C(N%17C(C=CC=C%18)=C%18C%19=C%17C=CC=C%19)C=C%20%21)=C%20N2C%22=C%21C=C(N%23C(C=CC=C%24)=C%24C%25=C%23C=CC=C%25)C=C%22
PPZ-BN	CC(C1=CC2=C(C3=C1)N(C4=CC=C(C(C)(C)C)C=C43)C5=C(B2C(C=C(C(C)(C)C)C=C67)=C6N8C9=C7C=C(C(C)(C)C)C=C9)C8=CC%10=C5N=C%11C(C(C=CC=C%12)=C%12C%13=C%11C=CC=C%13)=N%10)(C)C
NBO	CC(C1=CC2=C(C3=C1)N(C4=CC=C(C(C)(C)C)C=C43)C5=C(B2C(C=C(C(C)(C)C)C=C67)=C6N8C9=C7C=C(C(C)(C)C)C=C9)C8=C(C(C=CC=C%10)=C%10O%11)C%11=C5)(C)C
LTCz-BN	CC(C1=CC2=C(C3=C1)N(C4=CC=C(C(C)(C)C)C=C43)C5=C(B2C(C=C(C(C)(C)C)C=C67)=C6N8C9=C7C=C(C(C)(C)C)C=C9)C8=CC%10=C5C%11=CC(C(C)(C)C)=CC%12=C%11N%10C%13=CC=C(C(C)(C)C)C=C%13%12)(C)C
tCzphB-Ph	CC(C(C=C12)=CC3=C1N4C5=C(C=C6C7=C5B3C8=C9N7C%10=C(C=C(C(C)(C)C)C=C%10C9=CC(C(C)(C)C)=C8)C6(C%11=CC=CC=C%11)C%12=CC=CC=C%12)C(C%13=CC=CC=C%13)(C%14=CC=CC=C%14)C%15=CC(C(C)(C)C)=CC2=C%154)(C)C
tCzphB-FI	CC(C(C=C12)=CC3=C1N4C5=C(C=C6C7=C5B3C8=C9N7C%10=C(C=C(C(C)(C)C)C=C%10C9=CC(C(C)(C)C)=C8)C6(C%11=CC=CC=C%11%12)C%13=C%12C=CC=C%13)C(C%14=C%15C=CC=C%14)(C%16=CC=CC=C%16%15)C%17=CC(C(C)(C)C)=CC2=C%174)(C)C
DBCz-Mes	CC(C1=CC=C2N(C3=C4C=C(C(C)(C)C)C=C3C2=C1)C5=CC=CC6=C5B4C7=C(N6C8=C9C=C(C(C)(C)C)C=C8)C9=C%10C%11=C7C(C=C(C(C)(C)C)C=C%12)=C%12N%11C%13=C%14B%10C%15=C(C%16=CC(C(C)(C)C)=C%15)N(C%17=CC=C(C(C)(C)C)C=C%17%16)C%14=CC=C%13)(C)C
B2	CC(C=C1)=CC=C1N(C2=CC=C(C)C=C2B34)C5=C3C(N(C6=CC=C(C)C=C6B7C8=C9C=CC(C)=C8)C%10=C4C=C(C)C=C%10)=C7C(N9C%11=CC=C(C)C=C%11)=C5
B3	CC(C=C1)=CC2=C1N(C3=CC=C(C)C=C3B45)C6=C4C(N(C7=CC=C(C)C=C7B89)C%10=C5C=C(C)C=C%10)=C8C%11=C6B2C%12=CC(C)=CC=C%12N%11C%13=C9C=C(C)C=C%13
B4	CC(C=C1B2O)=CC3=C1N(C4=C2C=C(C)C=C4B56)C7=C5C(N(C8=CC=C(C)C=C8B9%10)C%11=C6C=C(C)C=C%11)=C9C%12=C7B3C%13=CC(C)=CC=C%13N%12C%14=C%10C=C(C)C=C%14
B2-F	FC(C=C1)=CC=C1N(C2=CC=C(F)C=C2B34)C5=C3C(N(C6=CC=C(F)C=C6B7C8=C9C=CC(F)=C8)C%10=C4C=C(F)C=C%10)=C7C(N9C%11=CC=C(F)C=C%11)=C5
CzDABNA-NP-M/TB	CC(C=C1)=CC2=C1N(C3=CC=C(C)C=C3)C4=CC(N(C5=CC=C(C)C=C5)C6=CC=C(C)C=C6)=CC7=C4B2C8=CC(C(C)(C)C)=CC9=C8N7C%10=CC=C(C(C)(C)C)C=C%109
CzB2-M/TB	CC(C=C1)=CC2=C1N(C3=CC=C(C)C=C3)C4=CC(N(C5=CC=C(C)C=C5)C6=CC=C(C)C=C6B78)=C7C9=C4B2C%10=CC(C(C)(C)C)=CC%11=C%10N9C%12=C8C=C(C(C)(C)C)C=C%12%11
BN1	CC(C=C(C)C=C1C)=C1N(C2=C(B34)C=C(C(C=CC=C5)=C5N6C7=CC=CC=C7)C6=C2)C8=C3C(N(C9=CC=CC=C9)C%10=C4C=CC=C%10)=CC(N(C%11=C(C)C=C(C)C=C%11C)C%12=CC(N(C%13=CC=CC=C%13)C%14=C%15C=CC=C%14)=C%15C=C%12)=C8
BN2	CC(C=C(C)C=C1C)=C1N2C3=CC(N(C4=CC=CC=C4)C5=CC=CC=C5)=CC(N(C6=C(C)C=C(C)C=C6C)C7=CC(N(C8=CC=CC=C8)C9=C%10C=CC=C9)=C%10C=C7%11)=C3B%11C%12=C2C=C%13C(C(C=CC=C%14)=C%14N%13C%15=CC=CC=C%15)=C%12
BN3	CC(C=C(C)C=C1C)=C1N(C2=C(B34)C=C(C(C=CC=C5)=C5N6C7=CC=CC=C7)C6=C2)C8=C3C(N9C%10=C4C=CC=C%10)=C%11C(N(C%12=C(C)C=C(C)C=C%12C)C%13=CC(N(C%14=CC=CC=C%14)C%15=C%16C=CC=C%15)=C%16C=C%13B%11C%17=CC=CC=C9%17)=C8
OBN	C1(OC2=CC(N(C3=CC=CC=C3)C4=CC=CC=C4)=CC5=C2B6C7=CC=CC=C7N5C8=CC=CC=C8)=C6C=CC=C1
NBN	C1(OC2=CC(N(C3=CC=CC=C3)C4=CC=CC=C4B56)=C5C(N(C7=CC=CC=C7)C8=C6C=CC=C8)=C2)=CC=CC=C1
ODBN	C1(OC2=CC(N(C3=CC=CC=C3)C4=CC=CC=C4B56)=C5C7=C2B8C9=CC=CC=C9N7C%10=C6C=CC=C%10)=C8C=CC=C1
DABNA-NP-M	CC(C=C1)=CC2=C1N(C3=CC=C(C)C=C3)C4=CC(N(C5=CC=C(C)C=C5)C6=CC=C(C)C=C6)=CC7=C4B2C8=CC(C)=CC=C8N7C9=CC=C(C)C=C9
DABNA-NP-TB	CC(C(C=C1)=CC2=C1N(C3=CC=C(C(C)(C)C)C=C3)C4=CC(N(C5=CC=C(C(C)(C)C)C=C5)C6=CC=C(C(C)(C)C)C=C6)=CC7=C4B2C8=CC(C(C)(C)C)=CC=C8N7C9=CC=C(C(C)(C)C)C=C9)(C)C
PAB	C12=CC(N(C3=CC=CC=C3)C4=CC=CC=C4)=CC(N(C5=CC=CC=C56)C7=CC=CC=C7)=C1B6C(C=CC=C8)=C8N2C9=CC=CC=C9
2tPAB	CC(C(C=C1)=CC2=C1N(C3=CC=C(C(C)(C)C)C=C3)C4=CC(N(C5=CC=CC=C5)C6=CC=CC=C6)=CC7=C4B2C8=CC(C(C)(C)C)=CC=C8N7C9=CC=C(C(C)(C)C)C=C9)(C)C
3tPAB	CC(C(C=C1)=CC2=C1N(C3=CC=C(C(C)(C)C)C=C3)C4=CC(N(C5=CC=C(C(C)(C)C)C=C5)C6=CC=C(C(C)(C)C)C=C6)=CC7=C4B2C8=CC(C(C)(C)C)=CC=C8N7C9=CC=C(C(C)(C)C)C=C9)(C)C
t-DAB-DPA	CC(C(C=C1)=CC2=C1N(C3=CC=C(C(C)(C)C)C=C3)C4=CC(N(C5=CC=C(C(C)(C)C)C=C5)C6=CC=C(C(C)(C)C)C=C6)=CC7=C4B2C8=CC(C(C)(C)C)=CC=C8N7C9=CC=C(C(C)(C)C)C=C9)(C)C
mBP-DABNA-Me	CC1=CC=CC(C)=C1N(C2=CC(C3=CC=CC=C3)=CC=C2B45)C6=C4C(N(C7=C5C=CC(C8=CC=CC=C8)=C7)C9=C(C)C=CC=C9C)=CC(N(C%10=C(C)C=CC=C%10C)C%11=CC=CC(C%12=CC=CC=C%12)=C%11)=C6
pBP-DABNA-Me	CC1=CC=CC(C)=C1N2C3=CC(N(C4=C(C)C=CC=C4C)C5=CC=C(C6=CC=CC=C6)C=C5)=CC(N(C7=CC=C(C8=CC=CC=C8)C=C79)C%10=C(C)C=CC=C%10C)=C3B9C%11=C2C=CC(C%12=CC=CC=C%12)=C%11
BP-2DPA	C1(N(C2=CC=CC=C2)C3=CC=CC=C3)=CC(N(C4=CC=CC=C4)C5=C6C=CC=C5)=C(B67)C(C8=CC=C9C%10=C8C7=CC=C%10C%11=CC=CC%12=CC=CC9=C%11%12)=C1
BP-4DPA	C1(N(C2=CC=CC=C2)C3=CC=CC=C3)=CC(N(C4=CC=CC=C4)C5=C6C=CC=C5)=C(B67)C(C8=CC=C9C%10=C8C7=CC=C%10C%11=CC=C(C%12=CC(N(C%13=CC=CC=C%13)C%14=CC=CC=C%14)=CC(N(C%15=CC=CC=C%15)C%16=CC=CC=C%16)=C%12)C%17=CC=CC9=C%11%17)=C1
CzDABNA-NP	C12=CC(N(C3=CC=CC=C3)C4=CC=CC=C4)=CC(N5C6=CC=CC=C6C7=C5C8=CC=C7)=C1B8C(C=CC=C9)=C9N2C%10=CC=CC=C%10
CzDABNA-NP-TB/H	CC(C)(C)C(C=C1)=CC=C1N(C2=CC=C(C(C)(C)C)C=C2)C3=CC(N4C5=CC=CC=C5C6=C4C7=CC=C6)=C8C(N(C9=C(B78)C=C(C(C)(C)C)C=C9)C%10=CC=C(C(C)(C)C)C=C%10)=C3
Cz2DABNA-NP-M/TB	CC(C=C1)=CC=C1N(C2=CC=C(C)C=C2)C3=CC(N4C5=CC=C(C(C)(C)C)C=C5C6=C4C7=CC(C(C)(C)C)=C6)=C8C(N(C9=C(B78)C=C(C(C)(C)C)C=C9%10)C%11=C%10C=C(C(C)(C)C)C=C%11)=C3
tCBNDA	CC(C1=CC(C2=C3C=CC(C(C)(C)C)=C2)=C4N3C5=CC(N(C6=CC=CC=C6)C7=CC=CC=C7)=CC(N(C8=CC=CC=C89)C%10=CC=CC=C%10)=C5B9C4=C1)(C)C
mICz-DABNA	C12=CC(N(C3=CC=CC=C3)C4=CC=CC=C4)=CC(N5C6=C(C=CC=C67)C8=C5C(C(C=CC=C9)=C9N%10C%11=CC=CC=C%11)=C%10C=C8)=C1B7C(C=CC=C%12)=C%12N2C%13=CC=CC=C%13
BFCz-DABNA	C12=CC(N(C3=CC=CC=C3)C4=CC=CC=C4)=CC(N5C6=C(C=CC=C67)C8=C5C(C(C=CC=C9)=C9O%10)=C%10C=C8)=C1B7C(C=CC=C%11)=C%11N2C%12=CC=CC=C%12
DPMX-CzDABNA	CC1=CC=CC(C)=C1N(C2=CC(C(C3=CC=CC=C3)(C4=CC=CC=C4)C5=C6C=CC=C5)=C6C=C2B78)C9=C7C(N%10C%11=C8C=C(C)C=C%11C%12=C%10C=CC(C)=C%12)=CC(N(C%13=C(C)C=CC=C%13C)C%14=CC(C(C%15=CC=CC=C%15)(C%16=CC=CC=C%16)C%17=C%18C=CC=C%17)=C%18C=C%14)=C9
mono-mx-CzDABNA	CC(C=CC=C1C)=C1N2C3=C(C=CC=C3)C4=C2C=C(N(C5=CC=CC=C5)C6=CC=CC=C6B7C8=C9C=CC=C8)C7=C4N9C%10=CC=CC=C%10
tri-mx-CzDABNA	CC(C=CC=C1C)=C1N2C3=C(C=CC=C3)C4=C2C=C(N(C5=C(C)C=CC=C5C)C6=CC=CC=C6B7C8=C9C=CC=C8)C7=C4N9C%10=C(C)C=CC=C%10C
MePABO	CC(C=CC=C1C)=C1N(C2=C(OC3=C4C=CC=C3)C4=CC=C2)C5=CC(N(C6=C(OC7=C8C=CC=C7)C8=CC=C6B9%10)C%11=C(C)C=CC=C%11C)=C%10C(N(C%12=C9C=CC%13=C%12OC%14=C%13C=CC=C%14)C%15=C(C)C=CC=C%15C)=C5
MePABS	CC(C=CC=C1C)=C1N(C2=C(SC3=C4C=CC=C3)C4=CC=C2)C5=CC(N(C6=C(SC7=C8C=CC=C7)C8=CC=C6B9%10)C%11=C(C)C=CC=C%11C)=C%10C(N(C%12=C9C=CC%13=C%12SC%14=C%13C=CC=C%14)C%15=C(C)C=CC=C%15C)=C5
tDMAC-BN	CC1(C)C2=C(C3=CC=C2)N(C4=C1C=CC=C4)C5=CC(N(C6=CC=C(C(C)(C)C)C=C6)C7=CC=C(C(C)(C)C)C=C7)=CC8=C5B3C9=CC(C(C)(C)C)=CC=C9N8C%10=CC=C(C(C)(C)C)C=C%10
tDPAC-BN	CC(C(C=C1)=CC2=C1N(C3=CC=C(C(C)(C)C)C=C3)C4=CC(N5C6=C(C=CC=C6)C(C7=CC=CC=C7)(C8=CC=CC=C8)C9=C5C=CC=C9)=CC%10=C4B2C%11=CC(C(C)(C)C)=CC=C%11N%10C%12=CC=C(C(C)(C)C)C=C%12)(C)C
PhDMAC-BN	CC(C1=C2C=CC=C1)(C)C3=C(C4=CC=C3)N2C5=CC(N(C6=CC=C(C7=CC=CC=C7)C=C6)C8=CC=C(C9=CC=CC=C9)C=C8)=CC%10=C5B4C%11=CC(C%12=CC=CC=C%12)=CC=C%11N%10C%13=CC=C(C%14=CC=CC=C%14)C=C%13
DOBNA-OAr	CC1=CC=CC=C1C2=CC(OC3=CC(OC4=CC=CC(C5=C(C)C=CC=C5)=C4)=CC6=C3B7C8=CC=C(C9=C(C)C=CC=C9)C=C8O6)=C7C=C2
1B-DTACrs	CC1=CC=CC=C1C2=C(OC3=CC=C(C)C=C3B4C(C=C(C)C=C5)=C5N6C7=CC=C(C)C=C7)C4=C6C=C2OC8=CC=C(C)C=C8
2B-DTACrs	CC1=CC=CC=C1C2=C(OC3=CC=C(C)C=C3B4C(C=C(C)C=C5)=C5N6C7=CC=C(C)C=C7B89)C4=C6C9=C2OC%10=C8C=C(C)C=C%10
Cl-MR	ClC(C=C1)=CC2=C1N(C3=CC=C(Cl)C=C3)C4=CC(N(C5=CC=C(Cl)C=C5)C6=CC=C(Cl)C=C6)=CC7=C4B2C8=CC(Cl)=CC=C8N7C9=CC=C(Cl)C=C9
Br-MR	BrC(C=C1)=CC2=C1N(C3=CC=C(Br)C=C3)C4=CC(N(C5=CC=C(Br)C=C5)C6=CC=C(Br)C=C6)=CC7=C4B2C8=CC(Br)=CC=C8N7C9=CC=C(Br)C=C9
DBT-BN	CC1=CC=CC(C)=C1N2C3=CC4=C(C=C3B5C6=C(N(C7=CC=C(C)C=C7)C8=C5C=C(C)C=C8)C=C(C9=CC=CC=C9)C=C26)SC%10=C4C=CC=C%10
DBF-DBN	CC(C=CC=C1C)=C1N(C2=CC(C3=CC=CC=C3)=CC4=C2B5C6=CC(C)=CC=C6N4C7=CC=C(C)C=C7)C(C5=C8)=CC9=C8OC%10=C9C=C(N(C%11=CC(C%12=CC=CC=C%12)=CC%13=C%11B%14C(C=C(C)C=C%15)=C%15N%13C%16=CC=C(C)C=C%16)C%17=C(C)C=CC=C%17C)C%14=C%10
DBT-DBN	CC(C=CC=C1C)=C1N(C2=CC(C3=CC=CC=C3)=CC4=C2B5C6=CC(C)=CC=C6N4C7=CC=C(C)C=C7)C(C5=C8)=CC9=C8SC%10=C9C=C(N(C%11=CC(C%12=CC=CC=C%12)=CC%13=C%11B%14C(C=C(C)C=C%15)=C%15N%13C%16=CC=C(C)C=C%16)C%17=C(C)C=CC=C%17C)C%14=C%10
OAB-ABP-1	CC1=CC2=C(OC3=CC(C4=C(C)C=C(C)C=C4C)=CC5=C3B2C6=CC(C)=CC7=C6N5C8=CC(C9=C(C)C=C(C)C=C9C)=CC%10=C8B7C%11=CC(C)=CC=C%11O%10)C=C1
CzB2-M/P	CC(C=C1)=CC2=C1N(C3=CC=C(C)C=C3)C4=CC(N(C5=CC=C(C)C=C5)C6=CC=C(C)C=C6B78)=C7C9=C4B2C%10=CC(C%11=CC=CC=C%11)=CC%12=C%10N9C%13=C8C=C(C%14=CC=CC=C%14)C=C%13%12
Cz2B2-M/TB	CC(C=C1)=CC=C1N(C2=CC=C(C)C=C2B34)C5=C3C(N6C7=C4C=C(C(C)(C)C)C=C7C8=C6C9=CC(C(C)(C)C)=C8)=C%10C(N(C%11=C(B9%10)C=C(C(C)(C)C)C=C%11%12)C%13=C%12C=C(C(C)(C)C)C=C%13)=C5
C-BN	CC1=CC=C(N(C2=CC(N(C3=CC=CC4=C3)C5=CC=CC=C5)=CC6=C2B7C(C=CC=C8)=C8N6C9=CC(N(C%10=CC(N4C%11=C%12C=CC=C%11)=C%13C(N(C%14=CC=C(C)C=C%14B%13%12)C%15=CC=C(C)C=C%15)=C%10)C%16=CC=CC=C%16)=CC=C9)C%17=CC=C(C)C=C%17)C7=C1
TDP4PA	C12=C3C=C(N(C4=CC=CC=C4)C5=CC(N(C6=CC=CC=C6)C7=CC=CC=C7)=CC8=C5B9C%10=CC=CC=C%10N8C%11=CC=CC=C%11)C9=C1OC%12=CC=CC=C%12B2C(C=CC=C%13)=C%13O3
tBu-TDP4PA	CC(C)(C)C1=CC=C2N(C3=CC=C(C(C)(C)C)C=C3)C4=C5C(N(C6=CC=C(C(C)(C)C)C=C6)C7=CC8=C9C(OC%10=CC=CC=C%10B9C(C=CC=C%11)=C%11O8)=C7B5C2=C1)=CC(N(C%12=CC=C(C(C)(C)C)C=C%12)C%13=CC=C(C(C)(C)C)C=C%13)=C4
DTBA-B2N3	CC(C=C1)=CC2=C1N(C3=C4C=C(C)C=C3)C5=C(B4C6=C7N8C9=C(C=CC=C9)C%10=C(C=CC=C%10)C7=CC=C6)C8=CC%11=C5B2C%12=C%13N%11C(C=CC=C%14)=C%14C(C=CC=C%15)=C%15C%13=CC=C%12
ν-DABNA	C1(N(C2=CC(N(C3=CC=CC=C3)C4=CC=CC=C4)=CC5=C2B6C7=CC8=C(N(C9=CC=CC=C9)C%10=CC(N(C%11=CC=CC=C%11)C%12=CC=CC=C%12)=CC%13=C%10B8C%14=CC=CC=C%14N%13C%15=CC=CC=C%15)C=C7N5C%16=CC=CC=C%16)C%17=C6C=CC=C%17)=CC=CC=C1
ν-DABNA-O-Me	CC1=CC(N(C2=CC(C)=CC(C)=C2)C3=C4C(N(C5=CC(C)=CC(C)=C5)C6=CC(N(C7=CC(C)=CC(C)=C7)C8=CC(N(C9=CC(C)=CC(C)=C9)C%10=CC(C)=CC(C)=C%10)=CC%11=C8B%12C%13=CC=C(C)C=C%13O%11)=C%12C=C6B%144)=CC(N(C%15=CC(C)=CC(C)=C%15)C%16=CC(C)=CC(C)=C%16)=C3)=C%14C=C1
t-Bu-ν-DABNA	CC(C(C=C1)=CC=C1N(C2=CC(N(C3=CC=C(C(C)(C)C)C=C3)C4=CC(N(C5=CC=CC=C5)C6=CC=CC=C6)=CC7=C4B8C9=CC=CC=C9N7C%10=CC=CC=C%10)=C8C=C2B%11%12)C%13=C%12C(N(C%14=C%11C=CC=C%14)C%15=CC=CC=C%15)=CC(N(C%16=CC=CC=C%16)C%17=CC=CC=C%17)=C%13)(C)C
m-ν-DABNA	CC1=CC=CC(N(C2=CC3=C(C(N(C4=C5C=C6C(N(C7=CC(N(C8=CC=CC(C)=C8)C9=CC(C)=CC=C9)=CC%10=C7B6C%11=C(N%10C%12=CC(C)=CC=C%12)C=C(C)C=C%11)C%13=CC=CC=C%13)=C4)C%14=CC=CC=C%14)=C2)B5C%15=CC=C(C)C=C%15N3C%16=CC=CC(C)=C%16)C%17=CC=CC(C)=C%17)=C1
4F-ν-DABNA	FC1=CC=CC(F)=C1N(C2=CC(N(C3=CC=CC=C3)C4=CC=CC=C4)=CC5=C2B6C7=CC=CC=C7N5C8=CC=CC=C8)C9=C6C=C%10C(N(C%11=C(F)C=CC=C%11F)C%12=CC(N(C%13=CC=CC=C%13)C%14=CC=CC=C%14)=CC%15=C%12B%10C(C=CC=C%16)=C%16N%15C%17=CC=CC=C%17)=C9
4F-m-ν-DABNA	CC1=CC=CC(N(C2=CC=CC(C)=C2)C3=CC(N(C4=CC(C)=CC=C4B56)C7=CC=CC(C)=C7)=C6C(N(C8=C(F)C=CC=C8F)C9=C5C=C%10C(N(C%11=C(F)C=CC=C%11F)C%12=CC(N(C%13=CC(C)=CC=C%13)C%14=CC=CC(C)=C%14)=CC%15=C%12B%10C(C=CC(C)=C%16)=C%16N%15C%17=CC(C)=CC=C%17)=C9)=C3)=C1
o-Tol-ν-DABNA-Me	CC(C=CC=C1C)=C1N(C2=CC=CC=C2)C3=CC(N(C4=C(C)C=CC=C4)C5=CC(N(C6=CC=CC=C6C)C7=CC(N(C8=C(C)C=CC=C8C)C9=CC=CC=C9)=CC%10=C7B%11C%12=CC=CC=C%12N%10C%13=C(C)C=CC=C%13C)=C%11C=C5B%14%15)=C%15C(N(C%16=C%14C=CC=C%16)C%17=C(C)C=CC=C%17C)=C3
NO-DBMR	C1(N(C2=CC(N(C3=CC=CC=C3)C4=CC=CC=C4)=CC5=C2B6C7=CC8=C(OC9=CC(N(C%10=CC=CC=C%10)C%11=CC=CC=C%11)=CC%12=C9B8C%13=CC=CC=C%13N%12C%14=CC=CC=C%14)C=C7N5C%15=CC=CC=C%15)C%16=C6C=CC=C%16)=CC=CC=C1
CzDBMR	C12=CC=CC=C1C3=CC=CC4=C3N2C5=CC(N(C6=CC=CC=C6)C7=CC=CC=C7)=CC8=C5B4C9=CC%10=C(N(C%11=CC=CC=C%11)C%12=CC(N(C%13=CC=CC=C%13)C%14=CC=CC=C%14)=CC%15=C%12B%10C%16=CC=CC%17=C%16N%15C%18=CC=CC=C%18%17)C=C9N8C%19=CC=CC=C%19
Π-CzBN	CC1=CC=C(N(C2=CC(N(C3=CC=CC=C3)C4=CC=CC=C4)=CC5=C2B6C7=CC8=C(N(C9=C(C)C=C(C)C=C9C)C%10=CC(N(C%11=CC=CC=C%11)C%12=CC=CC=C%12)=CC%13=C%10B8C%14=CC(C)=CC%15=C%14N%13C%16=CC=C(C)C=C%16%15)C=C7N5C%17=C(C)C=C(C)C=C%17C)C%18=C6C=C(C)C=C%18%19)C%19=C1
V-DABNA-Mes	CC1=CC(C)=CC(C)=C1N2C(C=C(N(C3=CC=CC=C3)C4=CC=CC=C4)C=C5N(C6=CC=CC=C6)C7=C8C=CC=C7)=C5B8C9=CC%10=C(C=C92)N(C%11=C(C)C=C(C)C=C%11C)C%12=C(B%10C(C=C%13C(N(C%14=C(C)C=C(C)C=C%14C)C%15=C%16B%13C%17=C(C=CC=C%17)N(C%18=CC=CC=C%18)C%16=CC(N(C%19=CC=CC=C%19)C%20=CC=CC=C%20)=C%15)=C%21)=C%21N%22C%23=C(C)C=C(C)C=C%23C)C%22=CC(N(C%24=CC=CC=C%24)C%25=CC=CC=C%25)=C%12
V-DABNA	C1(N(C2=CC=CC=C2)C3=C4C=C5C(N(C6=CC=CC=C6)C7=C8B5C9=C(C=CC=C9)N(C%10=CC=CC=C%10)C8=CC(N(C%11=CC=CC=C%11)C%12=CC=CC=C%12)=C7)=C3)=CC(N(C%13=CC=CC=C%13)C%14=CC=CC=C%14)=CC%15=C1B4C%16=C(C=C%17C(B%18C%19=C(C=C(N(C%20=CC=CC=C%20)C%21=CC=CC=C%21)C=C%19N(C%22=CC=CC=C%22)C%23=C%18C=CC=C%23)N%17C%24=CC=CC=C%24)=C%16)N%15C%25=CC=CC=C%25
V-DABNA-F	FC1=CC=CC(F)=C1N2C3=CC4=C(C=C3B5C6=C2C=C(N(C7=CC=CC=C7)C8=CC=CC=C8)C=C6N(C9=CC=CC=C9)C%10=C5C=CC=C%10)B%11C%12=C(N(C%13=C(F)C=CC=C%13F)C%14=C%11C=C(B%15C%16=C(C=C(N(C%17=CC=CC=C%17)C%18=CC=CC=C%18)C=C%16N(C%19=CC=CC=C%19)C%20=C%15C=CC=C%20)N%21C%22=C(F)C=CC=C%22F)C%21=C%14)C=C(N(C%23=CC=CC=C%23)C%24=CC=CC=C%24)C=C%12N4C%25=C(F)C=CC=C%25F
CzB4	CC1=CC(C)=CC(N2C3=CC(C(C)(C)C)=CC=C3B4C5=CC(CC(CC)CCCC)=CC6=C5N7C8=C4C2=CC(N(C9=CC(C)=CC(C)=C9)C%10=CC(N(C%11=CC(C)=CC(C)=C%11)C%12=CC(N(C%13=CC(C)=CC(C)=C%13)C%14=CC(C(C)(C)C)=CC=C%14B%15%16)=C%16C%17=C%12B%18C%19=CC(CC(CC)CCCC)=CC%20=C%19N%17C%21=C%15C=C(CC(CC)CCCC)C=C%21%20)=C%18C=C%10%22)=C8B%22C%23=C7C6=CC(CC(CC)CCCC)=C%23)=C1
CzB6	CC1=CC(C)=CC(N2C3=CC(C(C)(C)C)=CC=C3B4C5=CC(CC(CC)CCCC)=CC6=C5N7C8=C4C2=CC(N(C9=CC(C)=CC(C)=C9)C%10=CC(N(C%11=CC(C)=CC(C)=C%11)C%12=CC(N(C%13=CC(C)=CC(C)=C%13)C%14=CC(N(C%15=CC(C)=CC(C)=C%15)C%16=CC(N(C%17=CC(C)=CC(C)=C%17)C%18=CC(C(C)(C)C)=CC=C%18B%19%20)=C%20C%21=C%16B%22C%23=CC(CC(CC)CCCC)=CC%24=C%23N%21C%25=C%19C=C(CC(CC)CCCC)C=C%25%24)=C%22C=C%14B%26%27)=C%27C%28=C%12B%29C%30=CC(CC(CC)CCCC)=…
CzB8	CC1=CC(C)=CC(N2C3=CC(C(C)(C)C)=CC=C3B4C5=CC(CC(CC)CCCC)=CC6=C5N7C8=C4C2=CC(N(C9=CC(C)=CC(C)=C9)C%10=CC(N(C%11=CC(C)=CC(C)=C%11)C%12=CC(N(C%13=CC(C)=CC(C)=C%13)C%14=CC(N(C%15=CC(C)=CC(C)=C%15)C%16=CC(N(C%17=CC(C)=CC(C)=C%17)C%18=CC(N(C%19=CC(C)=CC(C)=C%19)C%20=CC(N(C%21=CC(C)=CC(C)=C%21)C%22=CC(C(C)(C)C)=CC=C%22B%23%24)=C%24C%25=C%20B%26C%27=CC(CC(CC)CCCC)=CC%28=C%27N%25C%29=C%23C=C(CC(CC)CCCC)C=C…
CzB4-oPh	CC1=CC2=C3N(C4=C5C=C(C)C=C42)C6=C7C(N(C8=CC=CC=C8)C9=CC=CC=C9B7C3=C1)=CC%10=C6B5C%11=CC%12=C(N(C%13=CC=CC=C%13C%14=CC=CC=C%14)C%15=CC(N(C%16=CC=CC=C%16)C%17=CC=CC=C%17B%18%19)=C%18C%20=C%15B%12C%21=CC(C)=CC%22=C%21N%20C%23=C%19C=C(C)C=C%23%22)C=C%11N%10C%24=CC=CC=C%24C%25=CC=CC=C%25
m[B-N]N1	CC(C1=CC(C2=C3C(N(C4=C5C=CC=C46)C7=C6C=CC=C7B3N8C9=C%10C=C(C(C)(C)C)C=C9)=C(B5N%11C%12=C(C=C(C(C)(C)C)C=C%12)C%13=C%11C%14=CC(C(C)(C)C)=C%13)C%14=C2N%15C(C=CC=C%16)=C%16C%17=C%15C=CC=C%17)=C8C%10=C1)(C)C
m[B-N]N2	CC(C(C=C1)=CC2=C1N(C3=C2C=C(C(C)(C)C)C=C3)C4=C5C(B6N7C8=C(C=CC=C8)C9=C7C5=CC=C9)=C(N(C%10=C6C=C(C(C)(C)C)C=C%10%11)C%12=C%11C=C(C(C)(C)C)C=C%12B%13N%14C%15=C%16C=CC=C%15)C%13=C4C%17=C%14C%16=CC=C%17)(C)C
P[B-N]O	CC(C(C=C1)=CC2=C1OC3=C(C4=CC(C(C)(C)C)=CC5=C4N6C7=C5C=C(C(C)(C)C)C=C7)C(B86)=C(OC9=C8C=C(C(C)(C)C)C=C9)C%10=C3B2N%11C%12=C(C=C(C(C)(C)C)C=C%12)C%13=C%11C%10=CC(C(C)(C)C)=C%13)(C)C
P[B-N]NO	CC(C(C=C1)=CC2=C1OC3=C(C4=CC(C(C)(C)C)=CC5=C4N6C7=C5C=C(C(C)(C)C)C=C7)C(B86)=C(N9C(C8=CC=C%10)=C%10C%11=C9C=CC=C%11)C%12=C3B2N%13C%14=C(C=C(C(C)(C)C)C=C%14)C%15=C%13C%12=CC(C(C)(C)C)=C%15)(C)C
P[B-N]NO	CC(C(C=C1)=CC2=C1N3C4=C2C=C(C(C)(C)C)C=C4C5=C(B63)C(N7C(C6=CC=C8)=C8C9=C7C=CC=C9)=C(C%10=CC(C(C)(C)C)=CC%11=C%10N%12C%13=C%11C=C(C(C)(C)C)C=C%13)C(B%14%12)=C5N%15C(C%14=CC=C%16)=C%16C%17=C%15C=CC=C%17)(C)C
BN2	CC(C1=CC2=C(C=C1)N3C4=C2C=C(C(C)(C)C)C=C4C5=CC=CC6=[N]5B3(C7=CC=CC=C7)N8C9=C(C=C(C(C)(C)C)C=C9)C%10=C8C6=CC(C(C)(C)C)=C%10)(C)C
TCz-BN2	CC(C)(C)C(C=C1)=CC2=C1N(C3=C2C=C(C=C3C4=CC(N5C6=C(C7=C5C=CC(C(C)(C)C)=C7)C=C(C(C)(C)C)C=C6)=CC(C8=CC(C(C)(C)C)=CC9=C8N%10C%11=C9C=C(C=C%11)C(C)(C)C)=[N]4%12)C(C)(C)C)B%12%10C%13=CC=CC=C%13
BN3	CC(C1=CC2=C(C3=C1)N4C5=C2C=C(C(C)(C)C)C=C5C6=CC=CC7=[N]6B4(C8=CC=CC=C8)N9C%10=C(C=C(C(C)(C)C)C=C%103)C%11=C9C7=CC(C(C)(C)C)=C%11)(C)C
ω-DABNA	CC(C1=CC=C2C(N(C3=C(B45)C(N(C6=C5C=CC=C6)C7=CC=CC=C7)=CC(N(C8=CC=CC=C8)C9=CC=CC=C9)=C3)C%10=C4C=C%11C%12=C%10B2C(C=CC(C(C)(C)C)=C%13)=C%13N%12C%14=CC(N(C%15=CC=CC=C%15)C%16=CC=CC=C%16)=CC%17=C%14B%11C%18=CC=CC=C%18N%17C%19=CC=CC=C%19)=C1)(C)C
pMDBA-Br	CC1=CC=C(OC2=C(B34)C(OC5=C4C=C(C)C=C5)=CC(Br)=C2)C3=C1
NOBNacene	CC1=CC=C2C(B(C3=C(O4)C=CC(C)=C3)C(C4=C(B5C6=C(C)C=CC=C6C)C(N(C7=CC(C)=CC(C)=C7)C8=C5C=C(B9C%10=C(C)C=CC=C%10C)C(N(C%11=CC(C)=CC(C)=C%11)C%12=C9C(O%13)=C(B(C(C=C(C)C=C%14)=C%14O%15)C%16=C%13C=CC(C)=C%16)C%15=C%12)=C8)=C%17)=C%17O2)=C1
MesB-DIDOBNA-N	CC1=CC=C(OC2=C(B3C4=C(O5)C=CC(C)=C4)C5=C(B6C7=C(C)C=CC=C7C)C(N(C8=C(C)C=C(C)C=C8)C9=C6C(O%10)=C(B(C(C=C(C)C=C%11)=C%11O%12)C%13=C%10C=CC(C)=C%13)C%12=C9)=C2)C3=C1
TB-tCz	CC(C1=CC2=C(OC3=C(B42)C(OC5=C4C=C(C(C)(C)C)C=C5)=CC(N6C(C=CC(C(C)(C)C)=C7)=C7C8=C6C=CC(C(C)(C)C)=C8)=C3)C=C1)(C)C
TB-tPCz	CC(C1=CC2=C(OC3=C(B42)C(OC5=C4C=C(C(C)(C)C)C=C5)=CC(N6C(C=CC(C7=CC=C(C(C)(C)C)C=C7)=C8)=C8C9=C6C=CC(C%10=CC=C(C(C)(C)C)C=C%10)=C9)=C3)C=C1)(C)C
BFCz-TDBA	CC(C(C=C1)=CC2=C1OC3=CC(N4C5=C(C=CC=C5)C6=C7C(C(C=CC=C8)=C8O7)=CC=C64)=CC9=C3B2C%10=C(C=CC(C(C)(C)C)=C%10)O9)(C)C
ICz-TDBA	CC(C1=C2C=CC=C1)(C)C3=C2C=C(C(C=CC=C4)=C4N5C6=CC(OC7=C8C=C(C(C)(C)C)C=C7)=C(B8C(C=C(C(C)(C)C)C=C9)=C9O%10)C%10=C6)C5=C3
PIdCz-TDBA	CC(C(C=C1)=CC2=C1OC3=CC(N4C5=C(C=CC=C5)C6=CC7=C(N(C8=CC=CC=C8)C9=C7C=CC=C9)C=C64)=CC%10=C3B2C%11=C(C=CC(C(C)(C)C)=C%11)O%10)(C)C
DBA-BFICz	C1(N2C(C=CC=C3)=C3C4=C2C5=C(N(C6=CC=CC=C6)C7=C5C=CC=C7)C8=C4OC9=C8C=CC=C9)=CC%10=C(B%11C(C=CC=C%12)=C%12O%10)C(OC%13=C%11C=CC=C%13)=C1
DBA-BTICz	C1(N2C(C=CC=C3)=C3C4=C2C5=C(N(C6=CC=CC=C6)C7=C5C=CC=C7)C8=C4SC9=C8C=CC=C9)=CC%10=C(B%11C(C=CC=C%12)=C%12O%10)C(OC%13=C%11C=CC=C%13)=C1
DBA-DI	C1(N2C(C=CC=C3)=C3C4=C2C5=C(N(C6=CC=CC=C6)C7=C5C=CC=C7)C8=C4N(C9=CC=CC=C9)C%10=C8C=CC=C%10)=CC%11=C(B%12C(C=CC=C%13)=C%13O%11)C(OC%14=C%12C=CC=C%14)=C1
TDBA-DI	CC(C)(C)C1=CC2=C(C=C1)OC3=CC(N4C(C=CC=C5)=C5C6=C4C7=C(N(C8=CC=CC=C8)C9=C7C=CC=C9)C%10=C6N(C%11=CC=CC=C%11)C%12=C%10C=CC=C%12)=CC%13=C3B2C(C=C(C(C)(C)C)C=C%14)=C%14O%13
TB-3Cz	CC(C1=CC2=C(OC3=C(B42)C(OC5=C4C=C(C(C)(C)C)C=C5)=CC(N6C(C=CC(N7C(C=CC=C8)=C8C9=C7C=CC=C9)=C%10)=C%10C%11=C6C=CC(N%12C(C=CC=C%13)=C%13C%14=C%12C=CC=C%14)=C%11)=C3)C=C1)(C)C
TB-3tBuCz	CC(C1=CC2=C(OC3=C(B42)C(OC5=C4C=C(C(C)(C)C)C=C5)=CC(N6C(C=CC(N7C(C=CC(C(C)(C)C)=C8)=C8C9=C7C=CC(C(C)(C)C)=C9)=C%10)=C%10C%11=C6C=CC(N%12C(C=CC(C(C)(C)C)=C%13)=C%13C%14=C%12C=CC(C(C)(C)C)=C%14)=C%11)=C3)C=C1)(C)C
M3CzB	CC(C=C1)=CC2=C1N(C3=CC=CC=C3)C(C=C4)=C2C=C4C5=CC(C6=C7C=CC(C8=CC=C(N(C9=CC=CC=C9)C%10=C%11C=C(C)C=C%10)C%11=C8)=C6)=C(C=C5)N7C%12=CC(OC%13=C%14C=CC=C%13)=C(B%15%14)C(OC%16=C%15C=CC=C%16)=C%12
3CzTB	CC(C)(C)C1=CC2=C(OC3=C(B42)C(OC5=C4C=C(C(C)(C)C)C=C5)=CC(N6C(C=CC(C7=CC(C(C=CC=C8)=C8N9C%10=CC=CC=C%10)=C9C=C7)=C%11)=C%11C%12=C6C=CC(C%13=CC=C(N(C%14=CC=CC=C%14)C%15=C%16C=CC=C%15)C%16=C%13)=C%12)=C3)C=C1
TB-P3Cz	CC(C)(C)C1=CC2=C(OC3=C(B42)C(OC5=C4C=C(C(C)(C)C)C=C5)=CC(N6C(C=CC(C7=CC(C(C=CC=C8)=C8N9C%10=CC=CC=C%10)=C9C=C7)=C%11)=C%11C%12=C6C=CC(C%13=CC=C(N(C%14=CC=CC=C%14)C%15=C%16C=CC=C%15)C%16=C%13)=C%12)=C3)C=C1
TB-DACz	CC(C1=CC2=C(OC3=C(B42)C(OC5=C4C=C(C(C)(C)C)C=C5)=CC(N6C(C=CC(N(C7=CC=CC=C7)C8=CC=CC=C8)=C9)=C9C%10=C6C=CC(N(C%11=CC=CC=C%11)C%12=CC=CC=C%12)=C%10)=C3)C=C1)(C)C
BO-tCzPhICz	CC(C(C=C1)=CC2=C1N(C3=C2C=C(C(C)(C)C)C=C3)C(C=C4)=CC5=C4N(C6=CC(OC7=C8C=C(C(C)(C)C)C=C7)=C(B8C(C=C(C(C)(C)C)C=C9)=C9O%10)C%10=C6)C%11=C5C=CC%12=C%11C(C=CC=C%13)=C%13N%12C%14=CC=CC=C%14)(C)C
BO-tCzDICz	CC(C(C=C1)=CC2=C1N(C3=C2C=C(C(C)(C)C)C=C3)C(C=C4)=CC5=C4N(C6=CC(OC7=C8C=C(C(C)(C)C)C=C7)=C(B8C(C=C(C(C)(C)C)C=C9)=C9O%10)C%10=C6)C%11=C5C=C%12C%13=C%11C(C=CC=C%14)=C%14N%13C%15=C%12C=CC=C%15)(C)C
TDBA-TPDICz	CC(C(C=C1)=CC2=C1OC3=C(B2C4=C(C=CC(C(C)(C)C)=C4)O5)C5=CC(N6C(C=CC=C7)=C7C8=C6C(C9=CC=CC=C9)=C%10C(N(C%11=CC=CC=C%11)C%12=C%10C=CC=C%12)=C8C%13=CC=CC=C%13)=C3)(C)C
BNB-m	CC(C1=CC2=C(C=C1)N(C3=CC(OC(C=CC=C4)=C4B5C(C=CC=C6)=C6O7)=C5C7=C3)C(C2=CC(C(C)(C)C)=C8)=C8C9=CC%10=C(C=C9)OC%11=CC=CC%12=C%11N%10C(C=C(C%13=CC(C(C)(C)C)=CC%14=C%13N(C%15=CC(OC%16=C%17C=CC=C%16)=C(B%17C(C=CC=C%18)=C%18O%19)C%19=C%15)C%20=C%14C=C(C(C)(C)C)C=C%20)C=C%21)=C%21O%12)(C)C
BNB-p	CC(C1=CC(C(C=C(C(C)(C)C)C=C2)=C2N3C4=CC(OC5=C6C=CC=C5)=C(B6C(C=CC=C7)=C7O8)C8=C4)=C3C(C9=CC(O%10)=C(C=C9)N%11C%12=C(C=C(C%13=C(N(C%14=CC(OC%15=C%16C=CC=C%15)=C(B%16C(C=CC=C%17)=C%17O%18)C%18=C%14)C%19=C%20C=C(C(C)(C)C)C=C%19)C%20=CC(C(C)(C)C)=C%13)C=C%12)OC%21=CC=CC%10=C%21%11)=C1)(C)C
1BOICz	FC(C1=CC(O2)=C(C=C1)B3C(C2=C4)=C(OC5=C3C=CC(C(F)(F)F)=C5)C=C4N6C7=C(C=CC=C7)C(C6=C8)=CC9=C8C(C=CC=C%10)=C%10N9C%11=CC=CC=C%11)(F)F
2BOICz	FC(C(C=C1)=CC2=C1B(C(C=CC(C(F)(F)F)=C3)=C3O4)C(C4=C5)=C(O2)C=C5N6C7=C(C=CC=C7)C8=C6C=C(C(C=CC=C9)=C9N%10C%11=CC(OC%12=C%13C=CC(C(F)(F)F)=C%12)=C(B%13C(C=CC(C(F)(F)F)=C%14)=C%14O%15)C%15=C%11)C%10=C8)(F)F
2BOICz-tBu	CC(C1=CC2=C(C=C1)OC3=C(B2C(C=C(C(C)(C)C)C=C4)=C4O5)C5=CC(N6C7=C(C=CC=C7)C8=C6C=C(C(C=CC=C9)=C9N%10C%11=CC(OC%12=C%13C=C(C(C)(C)C)C=C%12)=C(B%13C(C=C(C(C)(C)C)C=C%14)=C%14O%15)C%15=C%11)C%10=C8)=C3)(C)C
TDBA-Ac	CC(C1=C2C=CC=C1)(C)C3=C(C=CC=C3)N2C4=CC5=C(B6C(C=C(C(C)(C)C)C=C7)=C7O5)C(OC8=C6C=C(C(C)(C)C)C=C8)=C4
TDBA-DPAC	CC(C1=CC2=C(OC3=C(B42)C(OC5=C4C=C(C(C)(C)C)C=C5)=CC(N6C(C=CC=C7)=C7C(C8=CC=CC=C8)(C9=CC=CC=C9)C%10=C6C=CC=C%10)=C3)C=C1)(C)C
OBO-I	C1(OC2=C(B34)C(OC5=C3C=CC=C5)=CC(N6C(C=CC=C7)=C7[Si](C8=CC=CC=C8)(C9=CC=CC=C9)C%10=C6C=CC=C%10)=C2)=C4C=CC=C1
TDBA-PAS	CC(C)(C)C1=CC2=C(OC3=C(B42)C(OC5=C4C=C(C(C)(C)C)C=C5)=CC(N6C(C=CC=C7)=C7[Si](C8=CC=CC=C8)(C9=CC=CC=C9)C%10=C6C=CC=C%10)=C3)C=C1
TDBA-SAF	CC(C1=CC2=C(OC3=C(B42)C(OC5=C4C=C(C(C)(C)C)C=C5)=CC(N6C(C=CC=C7)=C7C8(C(C=CC=C9)=C9C%10=C8C=CC=C%10)C%11=C6C=CC=C%11)=C3)C=C1)(C)C
OBOtSAc	C1(OC2=C(B34)C(OC5=C3C=CC=C5)=CC(N6C(C=CC=C7)=C7C8(C(C=CC=C9)=C9C%10(C(C=CC=C%11)=C%11C%12=C%10C=CC=C%12)C%13=C8C=CC=C%13)C%14=C6C=CC=C%14)=C2)=C4C=CC=C1
tBuOBOtSAc	CC(C)(C)C1=CC2=C(OC3=CC(N4C(C=CC=C5)=C5C6(C(C=CC=C7)=C7C8(C(C=CC=C9)=C9C%10=C8C=CC=C%10)C%11=C6C=CC=C%11)C%12=C4C=CC=C%12)=CC(O%13)=C3B2C%14=C%13C=CC(C(C)(C)C)=C%14)C=C1
MH	CC1=CC(C2(C(C=CC=C3)=C3C4=C2C=CC=C4)C5=C6C=CC(C)=C5)=C(C=C1)N6C7=CC(OC8=C9C=C(C(C)(C)C)C=C8)=C(B%109)C(OC%11=C%10C=C(C(C)(C)C)C=C%11)=C7
MP	CC1=CC(C2(C(C=CC(C3=CC=CC=C3)=C4)=C4C5=C2C=CC(C6=CC=CC=C6)=C5)C7=C8C=CC(C)=C7)=C(C=C1)N8C9=CC(OC%10=C%11C=C(C(C)(C)C)C=C%10)=C(B%12%11)C(OC%13=C%12C=C(C(C)(C)C)C=C%13)=C9
PP	CC(C1=CC2=C(OC3=C(B42)C(OC5=C4C=C(C(C)(C)C)C=C5)=CC(N6C(C=CC(C7=CC=CC=C7)=C8)=C8C9(C(C=CC(C%10=CC=CC=C%10)=C%11)=C%11C%12=C9C=CC(C%13=CC=CC=C%13)=C%12)C%14=C6C=CC(C%15=CC=CC=C%15)=C%14)=C3)C=C1)(C)C
TDBA-SBA	CC(C1=CC=C(N2C(C=CC=C3)=C3C4(C(C=CC=C5)=C5N(C6=CC(OC7=C8C=C(C(C)(C)C)C=C7)=C(B8C(C=C(C(C)(C)C)C=C9)=C9O%10)C%10=C6)C%11=C4C=CC=C%11)C%12=C2C=CC=C%12)C=C1)(C)C
DBA-SAB	C1(OC2=C(B34)C(OC5=C3C=CC=C5)=CC(N6C(C=CC=C7)=C7C8(C(C=CC=C9)=C9N(C%10=CC(OC%11=C%12C=CC=C%11)=C(B%12C(C=CC=C%13)=C%13O%14)C%14=C%10)C%15=C8C=CC=C%15)C%16=C6C=CC=C%16)=C2)=C4C=CC=C1
2TDBA-SBA	CC(C)(C)C1=CC2=C(OC3=C(B42)C(OC5=C4C=C(C(C)(C)C)C=C5)=CC(N6C(C=CC=C7)=C7C8(C(C=CC=C9)=C9N(C%10=CC(OC%11=C%12C=C(C(C)(C)C)C=C%11)=C(B%12C(C=C(C(C)(C)C)C=C%13)=C%13O%14)C%14=C%10)C%15=C8C=CC=C%15)C%16=C6C=CC=C%16)=C3)C=C1
PXZBO1	CC(C1=CC2=C(OC3=C(B42)C(OC5=C4C=C(C(C)(C)C)C=C5)=CC(N6C(C=CC=C7)=C7OC8=C6C=CC=C8)=C3)C=C1)(C)C
PXZBO2	CC(C1=CC2=C(OC3=C(B42)C(OC5=C4C=C(C(C)(C)C)C=C5)=CC(N6C(C=C(N(C7=CC=C(C(C)(C)C)C=C7)C8=CC=C(C(C)(C)C)C=C8)C=C9)=C9OC%10=C6C=C(N(C%11=CC=C(C(C)(C)C)C=C%11)C%12=CC=C(C(C)(C)C)C=C%12)C=C%10)=C3)C=C1)(C)C
PzDBA	C1(OC2=C(B34)C(OC5=C3C=CC=C5)=CC(N6C(C=CC=C7)=C7N(C8=CC(OC(C=CC=C9)=C9B%10C(C=CC=C%11)=C%11O%12)=C%10C%12=C8)C%13=C6C=CC=C%13)=C2)=C4C=CC=C1
PzTDBA	CC(C)(C)C1=CC(B2C(C=C(C(C)(C)C)C=C3)=C3O4)=C(C=C1)OC5=C2C4=CC(N(C6=C7C=CC=C6)C8=C(C=CC=C8)N7C9=CC(OC%10=C%11C=C(C(C)(C)C)C=C%10)=C(B%12%11)C(OC%13=C%12C=C(C(C)(C)C)C=C%13)=C9)=C5
BCz	CC(C1=CC2=C(OC3=C(B42)C(OC5=C4C=C(C(C)(C)C)C=C5)=CC(C6=CC=C(N7C(C=CC=C8)=C8C9=C7C=CC=C9)C=C6N%10C(C=CC=C%11)=C%11C%12=C%10C=CC=C%12)=C3)C=C1)(C)C
BBFCz	CC(C1=CC2=C(OC3=C(B42)C(OC5=C4C=C(C(C)(C)C)C=C5)=CC(C6=CC=C(N7C(C=CC8=C9OC%10=C8C=CC=C%10)=C9C%11=C7C=CC=C%11)C=C6N%12C(C=CC%13=C%14OC%15=C%13C=CC=C%15)=C%14C%16=C%12C=CC=C%16)=C3)C=C1)(C)C
BICz	CC(C1=C2C=CC=C1)(C)C(C2=C3)=CC4=C3C(C=CC=C5)=C5N4C(C=C6N7C(C=C(C(C)(C)C8=C9C=CC=C8)C9=C%10)=C%10C%11=C7C=CC=C%11)=CC=C6C%12=CC(OC%13=C%14C=C(C(C)(C)C)C=C%13)=C(B%15%14)C(OC%16=C%15C=C(C(C)(C)C)C=C%16)=C%12
BDTC	CC(C(C=C1)=CC2=C1OC3=CC(C(C=C4)=CC=C4C5(C6=CC=C(C7=CC(OC8=C9C=C(C(C)(C)C)C=C8)=C(B9C(C=C(C(C)(C)C)C=C%10)=C%10O%11)C%11=C7)C=C6)CCCCC5)=CC%12=C3B2C%13=C(C=CC(C(C)(C)C)=C%13)O%12)(C)C
AC-BO	CC(C(C=C1)=CC2=C1OC3=CC(C4=C(C5(C(C=CC=C6)=C6N(C7=CC=CC=C7)C8=C5C=CC=C8)C9=C%10C=CC=C9)C%10=CC=C4)=CC%11=C3B2C%12=C(C=CC(C(C)(C)C)=C%12)O%11)(C)C
QAC-BO	CC1(C)C(C=CC=C2)=C2N(C3=C4C=CC=C3)C5=C(C=CC=C51)C4(C6=C7C=CC=C6)C(C7=CC=C8)=C8C9=CC%10=C(B(C(C=C(C(C)(C)C)C=C%11)=C%11O%12)C%13=C(C=CC(C(C)(C)C)=C%13)O%10)C%12=C9
Cz-BO	CC(C(C=C1)=CC2=C1OC3=CC(C4=C(C5(C(C=CC=C6C7=C8C=CC=C7)=C6N8C9=C5C=CC=C9)C%10=C%11C=CC=C%10)C%11=CC=C4)=CC%12=C3B2C%13=C(C=CC(C(C)(C)C)=C%13)O%12)(C)C
BCzTC	CC(C(C=C1)=CC2=C1OC3=CC(C(C=C4)=CC=C4C5(C6=CC=C(N7C(C=CC=C8)=C8C9=C7C=CC(N%10C(C=CC=C%11)=C%11C%12=C%10C=CC=C%12)=C9)C=C6)CCCCC5)=CC%13=C3B2C%14=C(C=CC(C(C)(C)C)=C%14)O%13)(C)C
tBOSi	CC(C1=CC2=C(C=C1)OC3=C(B2C(C=C(C(C)(C)C)C=C4)=C4O5)C5=CC(C6=CC=C([Si](C7=CC=CC=C7)(C8=CC=CC=C8)C9=CC=CC=C9)C=C6)=C3)(C)C
tBOSiCz	CC(C1=CC2=C(C=C1)OC3=C(B2C(C=C(C(C)(C)C)C=C4)=C4O5)C5=CC(C6=CC=C([Si](C7=CC=C(N8C(C=CC=C9)=C9C%10=C8C=CC=C%10)C=C7)(C%11=CC=CC=C%11)C%12=CC=CC=C%12)C=C6)=C3)(C)C
BOQAO	O=C1C2=C3N(C(C=CC(C(C)(C)C)=C4)=C4C(C3=CC(C5=CC(OC6=C7C=C(C(C)(C)C)C=C6)=C(B7C(C=C(C(C)(C)C)C=C8)=C8O9)C9=C5)=C2)=O)C%10=C1C=C(C(C)(C)C)C=C%10
m-AC-DBNA	CC1(C)C2=C(C=CC=C2)N(C3=CC4=C(OC5=C(B64)C(OC7=C6C=C(N8C9=CC=CC=C9C(C)(C)C%10=C8C=CC=C%10)C=C7)=CC=C5)C=C3)C%11=CC=CC=C%111
p-AC-DBNA	CC(C1=C2C=CC=C1)(C)C3=C(C=CC=C3)N2C4=CC(OC5=C(B67)C(OC8=C6C=CC(N9C(C=CC=C%10)=C%10C(C)(C)C%11=C9C=CC=C%11)=C8)=CC=C5)=C7C=C4
m'-AC-DBNA	CC(C1=C2C=CC=C1)(C)C3=C(C=CC=C3)N2C4=CC=CC5=C4OC6=C(B75)C(OC8=C7C=CC=C8N9C(C=CC=C%10)=C%10C(C)(C)C%11=C9C=CC=C%11)=CC=C6
DBA-DmICz	C1(N2C(C=CC=C3)=C3C4=C2C5=C(N(C6=CC=CC=C6)C7=C5C=CC=C7)C=C4)=CC(OC8=C(B9%10)C(OC%11=C9C=CC(N%12C(C(C(C=CC=C%13)=C%13N%14C%15=CC=CC=C%15)=C%14C=C%16)=C%16C%17=C%12C=CC=C%17)=C%11)=CC=C8)=C%10C=C1
DBA-DTMCz	CC1=CC(C)=CC(C2=C3C(C)=CC(C)=C2)=C1N3C4=CC(OC5=C(B67)C(OC8=C6C=CC(N9C(C(C)=CC(C)=C%10)=C%10C%11=C9C(C)=CC(C)=C%11)=C8)=CC=C5)=C7C=C4
DBA-Cz	CC(C(C=C1)=CC2=C1N(C3=CC4=C(OC5=C(B46)C(OC7=C6C=C(N8C(C=CC(C(C)(C)C)=C9)=C9C%10=C8C=CC(C(C)(C)C)=C%10)C=C7)=CC=C5)C=C3)C%11=C2C=C(C(C)(C)C)C=C%11)(C)C
OBO-ll	C1(N2C(C=CC=C3)=C3[Si](C4=CC=CC=C4)(C5=CC=CC=C5)C6=C2C=CC=C6)=CC(OC7=C(B89)C(OC%10=C8C=CC(N%11C(C=CC=C%12)=C%12[Si](C%13=CC=CC=C%13)(C%14=CC=CC=C%14)C%15=C%11C=CC=C%15)=C%10)=CC=C7)=C9C=C1
OBA-O	C12=CC=C(C3=CC=C(N4C(C=CC=C5)=C5OC6=C4C=CC=C6)C=C3)C(OC7=C8C=CC=C7)=C1B8C9=CC=CC=C9O2
OBA-S	C12=CC=C(C3=CC=C(N4C(C=CC=C5)=C5SC6=C4C=CC=C6)C=C3)C(OC7=C8C=CC=C7)=C1B8C9=CC=CC=C9O2
OBA-BrO	BrC1=C2C(B3C4=CC=CC=C4O2)=C(OC5=C3C=CC=C5)C(C6=CC=C(N7C(C=CC=C8)=C8OC9=C7C=CC=C9)C=C6)=C1
OBA-BrS	BrC1=C2C(B3C4=CC=CC=C4O2)=C(OC5=C3C=CC=C5)C(C6=CC=C(N7C(C=CC=C8)=C8SC9=C7C=CC=C9)C=C6)=C1
PS-BOO	†CCC(CC(C1=CC=CC=C1)C)C2=CC3=C4C(OC(C=CC=C5)=C5B4C(C=CC=C6)=C6O3)=C2
PS-BOS	†CCC(CC(C1=CC=CC=C1)C)C2=CC3=C4C(OC(C=CC=C5)=C5B4C(C=CC=C6)=C6S3)=C2
PS-BSS	†CCC(CC(C1=CC=CC=C1)C)C2=CC3=C4C(SC(C=CC=C5)=C5B4C(C=CC=C6)=C6S3)=C2
PBO-TB-5	†CCC(CC(C(C=C1)=CC=C1N2C3=C(C=CC=C3)C(C)(C)C4=C2C=CC=C4)C)C5=CC6=C7C(OC(C=CC(C(C)(C)C)=C8)=C8B7C(C=C(C(C)(C)C)C=C9)=C9O6)=C5
PBO-TB-10	††CCC(CC(C(C=C1)=CC=C1N2C3=C(C=CC=C3)C(C)(C)C4=C2C=CC=C4)C)C5=CC6=C7C(OC(C=CC(C(C)(C)C)=C8)=C8B7C(C=C(C(C)(C)C)C=C9)=C9O6)=C5
PBO-H-5	†CCC(CC(C(C=C1)=CC=C1N2C3=C(C=CC=C3)C(C)(C)C4=C2C=CC=C4)C)C5=CC6=C7C(OC(C=CC=C8)=C8B7C(C=CC=C9)=C9O6)=C5
PBO-H-10	††CCC(CC(C(C=C1)=CC=C1N2C3=C(C=CC=C3)C(C)(C)C4=C2C=CC=C4)C)C5=CC6=C7C(OC(C=CC=C8)=C8B7C(C=CC=C9)=C9O6)=C5
PBO-F-5	†CCC(CC(C(C=C1)=CC=C1N2C3=C(C=CC=C3)C(C)(C)C4=C2C=CC=C4)C)C5=CC6=C7C(OC(C=CC(F)=C8)=C8B7C(C=C(F)C=C9)=C9O6)=C5
PBO-F-10	††CCC(CC(C(C=C1)=CC=C1N2C3=C(C=CC=C3)C(C)(C)C4=C2C=CC=C4)C)C5=CC6=C7C(OC(C=CC(F)=C8)=C8B7C(C=C(F)C=C9)=C9O6)=C5
ABP91	†CCC(CC(C(C=C1)=CC=C1CN2C3=C(C=CC=C3)C(C4=CC=CC=C4)(C5=CC=CC=C5)C6=C2C=CC=C6)C)C7=CC=C(C8=CC9=C%10C(OC(C=CC(C(C)(C)C)=C%11)=C%11B%10C(C=C(C(C)(C)C)C=C%12)=C%12O9)=C8)C=C7
ABP73	††CCC(CC(C(C=C1)=CC=C1CN2C3=C(C=CC=C3)C(C4=CC=CC=C4)(C5=CC=CC=C5)C6=C2C=CC=C6)C)C7=CC=C(C8=CC9=C%10C(OC(C=CC(C(C)(C)C)=C%11)=C%11B%10C(C=C(C(C)(C)C)C=C%12)=C%12O9)=C8)C=C7
ABP55	†††CCC(CC(C(C=C1)=CC=C1CN2C3=C(C=CC=C3)C(C4=CC=CC=C4)(C5=CC=CC=C5)C6=C2C=CC=C6)C)C7=CC=C(C8=CC9=C%10C(OC(C=CC(C(C)(C)C)=C%11)=C%11B%10C(C=C(C(C)(C)C)C=C%12)=C%12O9)=C8)C=C7
PAc-BOO	†CCC(CC(C(C=C1)=CC=C1N2C3=C(C=CC=C3)C(C)(C)C4=C2C=CC=C4)C)C5=CC6=C7C(OC(C=CC=C8)=C8B7C(C=CC=C9)=C9O6)=C5
PAc-BOS	†CCC(CC(C(C=C1)=CC=C1N2C3=C(C=CC=C3)C(C)(C)C4=C2C=CC=C4)C)C5=CC6=C7C(OC(C=CC=C8)=C8B7C(C=CC=C9)=C9S6)=C5
PAc-BSS	†CCC(CC(C(C=C1)=CC=C1N2C3=C(C=CC=C3)C(C)(C)C4=C2C=CC=C4)C)C5=CC6=C7C(SC(C=CC=C8)=C8B7C(C=CC=C9)=C9S6)=C5
PhCz-TOSBA	CC(C1=CC2=C(OC3=C(B42)C(SC5=C4C=C(C(C)(C)C)C=C5)=CC(C6=CC(C(C=CC=C7)=C7N8C9=CC=CC=C9)=C8C=C6)=C3)C=C1)(C)C
TPA-TOSBA	CC(C1=CC2=C(OC3=C(B42)C(SC5=C4C=C(C(C)(C)C)C=C5)=CC(C6=CC=C(N(C7=CC=CC=C7)C8=CC=CC=C8)C=C6)=C3)C=C1)(C)C
TSBA-Cz	CC(C1=CC2=C(SC3=C(B42)C(SC5=C4C=C(C(C)(C)C)C=C5)=CC(N6C(C=CC=C7)=C7C8=C6C=CC=C8)=C3)C=C1)(C)C
TSBA-PhCz	CC(C1=CC2=C(SC3=C(B42)C(SC5=C4C=C(C(C)(C)C)C=C5)=CC(C6=CC(C(C=CC=C7)=C7N8C9=CC=CC=C9)=C8C=C6)=C3)C=C1)(C)C
BSS-Cz	C1(SC2=C(B34)C(SC5=C3C=CC=C5)=CC(N6C(C=CC=C7)=C7C8=C6C=CC=C8)=C2)=C4C=CC=C1
BSS-PA	C1(SC2=C(B34)C(SC5=C3C=CC=C5)=CC(N(C6=CC=CC=C6)C7=CC=CC=C7)=C2)=C4C=CC=C1
BSS-SpAC	C1(SC2=C(B34)C(SC5=C3C=CC=C5)=CC(N6C(C=CC=C7)=C7C8(C(C=CC=C9)=C9C%10=C8C=CC=C%10)C%11=C6C=CC=C%11)=C2)=C4C=CC=C1
BSS-Ac	CC(C1=C2C=CC=C1)(C)C3=C(C=CC=C3)N2C4=CC(SC5=C6C=CC=C5)=C(B76)C(SC8=C7C=CC=C8)=C4
Ph-OBNA	C1(OC2=C(B34)C(OC5=C3C=CC=C5)=C6C(N(C7=CC=CC=C7)C8=C6C=CC=C8)=C2)=C4C=CC=C1
DOBDikTa	O=C1C2=C(N(C3=C4C=CC=C13)C5=CC=C(C(C)(C)C)C=C5C4=O)C=C6C7=C2OC(C=CC(C(C)(C)C)=C8)=C8B7C(C=C(C(C)(C)C)C=C9)=C9O6
CzBN1	C12=CC(N3C(C=CC=C4)=C4OC5=C3C=CC=C5)=CC(N6C7=C8C=CC=C7C9=CC=CC=C69)=C1B8C(C=CC=C%10%11)=C%10N2C%12=C%11C=CC=C%12
CzBN2	CC(C(C=C1C2=C3C=CC(C(C)(C)C)=C2)=CC4=C1N3C5=CC(N6C(C=CC=C7)=C7OC8=C6C=CC=C8)=CC9=C5B4C%10=C%11N9C%12=CC=CC=C%12C%11=CC=C%10)(C)C
CzBN3	CC(C1=CC2=C(C3=C1)N(C4=CC=C(C(C)(C)C)C=C43)C5=C(B2C(C=C(C(C)(C)C)C=C67)=C6N8C9=C7C=C(C(C)(C)C)C=C9)C8=CC(N%10C(C=CC=C%11)=C%11OC%12=C%10C=CC=C%12)=C5)(C)C
BNCz-PXZ	CC(C1=CC2=C(C3=C1)N(C4=CC=C(C(C)(C)C)C=C43)C5=C(B2C(C=C(C(C)(C)C)C=C67)=C6N8C9=C7C=C(C(C)(C)C)C=C9)C8=CC(N%10C(C=CC=C%11)=C%11OC%12=C%10C=CC=C%12)=C5)(C)C
BNCz-DMAC	CC(C1=C2C=CC=C1)(C)C3=C(C=CC=C3)N2C4=CC(N5C6=C7C=C(C(C)(C)C)C=C6C8=CC(C(C)(C)C)=CC=C58)=C(B7C(C=C(C(C)(C)C)C=C9%10)=C9N%11C%12=C%10C=C(C(C)(C)C)C=C%12)C%11=C4
BNCz-SAF	CC(C1=CC2=C(C3=C1)N(C4=CC=C(C(C)(C)C)C=C43)C5=C(B2C(C=C(C(C)(C)C)C=C67)=C6N8C9=C7C=C(C(C)(C)C)C=C9)C8=CC(N%10C(C=CC=C%11)=C%11C%12(C(C=CC=C%13)=C%13C%14=C%12C=CC=C%14)C%15=C%10C=CC=C%15)=C5)(C)C
SPAC-tCzBN	CC(C1=CC2=C(C3=C1)N(C4=CC=C(C(C)(C)C)C=C43)C5=C(B2C(C=C(C(C)(C)C)C=C67)=C6N8C9=C7C=C(C(C)(C)C)C=C9)C8=CC(N%10C(C=CC=C%11)=C%11C%12(C(C=CC=C%13)=C%13C%14=C%12C=CC=C%14)C%15=C%10C=CC=C%15)=C5)(C)C
SPBAC-tCzBN	CC(C1=CC2=C(C3=C1)N(C4=CC=C(C(C)(C)C)C=C43)C5=C(B2C(C=C(C(C)(C)C)C=C67)=C6N8C9=C7C=C(C(C)(C)C)C=C9)C8=CC(N%10C(C=CC=C%11)=C%11C%12(C(C=CC=C%13)=C%13C%14=C%12C=CC=C%14)C%15=C%10C=C%16C(C=CC=C%16)=C%15)=C5)(C)C
TBA-BCz-BN	CC(C1=CC2=C(C3=C1)N(C4=CC=C(C(C)(C)C)C=C43)C5=C(B2C(C=C(C(C)(C)C)C=C67)=C6N8C9=C7C=C(C(C)(C)C)C=C9)C8=CC(N%10C(C=CC=C%11)=C%11C(C=CC=C%12)=C%12C%13=C%10C=CC=C%13)=C5)(C)C
DCz-BSN	CC(C1=CC=C2C(C3=CC(C(C)(C)C)=CC4=C3N2C5=C6B4C7=C(SC6=CC(N8C(C=CC(C(C)(C)C)=C9)=C9C%10=C8C=CC(C(C)(C)C)=C%10)=C5)C=CC=C7)=C1)(C)C
DCz-BSeN	CC(C1=CC=C2C(C3=CC(C(C)(C)C)=CC4=C3N2C5=C6B4C7=C([Se]C6=CC(N8C(C=CC(C(C)(C)C)=C9)=C9C%10=C8C=CC(C(C)(C)C)=C%10)=C5)C=CC=C7)=C1)(C)C
BNCz-pTPA	CC(C1=CC2=C(C3=C1)N(C4=CC=C(C(C)(C)C)C=C43)C5=C(B2C(C=C(C(C)(C)C)C=C67)=C6N8C9=C7C=C(C(C)(C)C)C=C9)C8=CC(C%10=CC=C(N(C%11=CC=CC=C%11)C%12=CC=CC=C%12)C=C%10)=C5)(C)C
BNCz-mTPA	CC(C1=CC2=C(C3=C1)N(C4=CC=C(C(C)(C)C)C=C43)C5=C(B2C(C=C(C(C)(C)C)C=C67)=C6N8C9=C7C=C(C(C)(C)C)C=C9)C8=CC(C%10=CC=CC(N(C%11=CC=CC=C%11)C%12=CC=CC=C%12)=C%10)=C5)(C)C
o-SPAC-tCzBN	CC(C1=CC2=C(N3C4=C(B5C6=C3C2=CC(C(C)(C)C)=C6)C(N7C8=C5C=C(C(C)(C)C)C=C8C9=C7C=CC(C(C)(C)C)=C9)=CC(C%10=CC=CC=C%10N%11C%12=C(C=CC=C%12)C%13(C(C=CC=C%14)=C%14C%15=C%13C=CC=C%15)C%16=C%11C=CC=C%16)=C4)C=C1)(C)C
S-Cz-BN	CC(C1=CC2=C(N3C4=C(B5C6=C3C2=CC(C(C)(C)C)=C6)C(N7C8=C5C=C(C(C)(C)C)C=C8C9=C7C=CC(C(C)(C)C)=C9)=CC(C%10=C(N%11C(C=CC=C%12)=C%12C%13=C%11C=CC=C%13)C=CC=C%10)=C4)C=C1)(C)C
D-Cz-BN	CC(C1=CC2=C(N3C4=C(B5C6=C3C2=CC(C(C)(C)C)=C6)C(N7C8=C5C=C(C(C)(C)C)C=C8C9=C7C=CC(C(C)(C)C)=C9)=CC(C%10=C(N%11C(C=CC(C(C)(C)C)=C%12)=C%12C%13=C%11C=CC(C(C)(C)C)=C%13)C=CC=C%10N%14C(C=CC(C(C)(C)C)=C%15)=C%15C%16=C%14C=CC(C(C)(C)C)=C%16)=C4)C=C1)(C)C
BN-CP1	CC(C1=CC2=C(N3C4=C(B5C6=C3C2=CC(C(C)(C)C)=C6)C(N7C8=C5C=C(C(C)(C)C)C=C8C9=C7C=CC(C(C)(C)C)=C9)=CC(C%10=C(N%11C(C=CC=C%12)=C%12C%13=C%11C=CC=C%13)C=CC=C%10N%14C(C=CC=C%15)=C%15C%16=C%14C=CC=C%16)=C4)C=C1)(C)C
BN-CP2	CC(C1=CC2=C(N3C4=C(B5C6=C3C2=CC(C(C)(C)C)=C6)C(N7C8=C5C=C(C(C)(C)C)C=C8C9=C7C=CC(C(C)(C)C)=C9)=CC(C%10=C(N%11C(C=CC=C%12)=C%12C%13=C%11C=CC=C%13)C=CC=C%10N%14C(C=CC=C%15)=C%15C%16=C%14C=CC=C%16)=C4)C=C1)(C)C
BN-PhOH	[H]OC(C=C1)=CC=C1C2=CC(N3C4=C5C=C(C(C)(C)C)C=C4C6=CC(C(C)(C)C)=CC=C36)=C(B5C(C=C(C(C)(C)C)C=C78)=C7N9C%10=C8C=C(C(C)(C)C)C=C%10)C9=C2
BN-PhOCH3	COC(C=C1)=CC=C1C2=CC(N3C4=C5C=C(C(C)(C)C)C=C4C6=CC(C(C)(C)C)=CC=C36)=C(B5C(C=C(C(C)(C)C)C=C78)=C7N9C%10=C8C=C(C(C)(C)C)C=C%10)C9=C2
SF1BN	CC(C1=CC2=C(C=C1)N3C4=C(B(C5=C6N7C(C=CC(C(C)(C)C)=C8)=C8C6=CC(C(C)(C)C)=C5)C9=C3C2=CC(C(C)(C)C)=C9)C7=CC(C%10=C(C%11(C%12=CC=CC=C%12C%13=C%11C=CC=C%13)C%14=CC=CC=C%15%14)C%15=CC=C%10)=C4)(C)C
SF3BN	CC(C1=CC2=C(C=C1)N3C4=C(B(C5=C6N7C(C=CC(C(C)(C)C)=C8)=C8C6=CC(C(C)(C)C)=C5)C9=C3C2=CC(C(C)(C)C)=C9)C7=CC(C%10=CC=C%11C(C(C=CC=C%12)=C%12C%11%13C(C=CC=C%14)=C%14C%15=C%13C=CC=C%15)=C%10)=C4)(C)C
BN-36Cz-BN	CCCCCCCCC(CCCCCCCC)N1C2=C(C=C(C3=CC(N(C4=CC=C(C(C)(C)C)C=C45)C(C5=CC(C(C)(C)C)=C6)=C6B7C(C=C(C(C)(C)C)C=C89)=C8N%10C%11=C9C=C(C(C)(C)C)C=C%11)=C7C%10=C3)C=C2)C%12=C1C=CC(C%13=CC(N%14C%15=C%16C=C(C(C)(C)C)C=C%15C%17=CC(C(C)(C)C)=CC=C%14%17)=C(B%16C(C=C(C(C)(C)C)C=C%18%19)=C%18N%20C%21=C%19C=C(C(C)(C)C)C=C%21)C%20=C%13)=C%12
BN-27Cz-BN	CCCCCCCCC(CCCCCCCC)N1C2=C(C=CC(C3=CC(N4C5=C6C=C(C(C)(C)C)C=C5C7=CC(C(C)(C)C)=CC=C47)=C(B6C(C=C(C(C)(C)C)C=C89)=C8N%10C%11=C9C=C(C(C)(C)C)C=C%11)C%10=C3)=C2)C%12=C1C=C(C%13=CC(N%14C%15=C%16C=C(C(C)(C)C)C=C%15C%17=CC(C(C)(C)C)=CC=C%14%17)=C(B%16C(C=C(C(C)(C)C)C=C%18%19)=C%18N%20C%21=C%19C=C(C(C)(C)C)C=C%21)C%20=C%13)C=C%12
PCzBN1	†CC(C1=CC2=C(C3=C1)N(C4=CC=C(C(C)(C)C)C=C43)C5=C(B2C(C=C(C(C)(C)C)C=C67)=C6N8C9=C7C=C(C(C)(C)C)C=C9)C8=CC(C%10=CC=C(N%11C(C=CC(C%12=CC=CC=C%12)=C%13)=C%13C%14=C%11C=CC(C%15=CC=C(N(C%16=C%17C=C(C%18=CC=CC=C%18)C=C%16)C(CCCCCCCC)CCCCCCCC)C%17=C%15)=C%14)C=C%10)=C5)(C)C
PCzBN3	††CC(C1=CC2=C(C3=C1)N(C4=CC=C(C(C)(C)C)C=C43)C5=C(B2C(C=C(C(C)(C)C)C=C67)=C6N8C9=C7C=C(C(C)(C)C)C=C9)C8=CC(C%10=CC=C(N%11C(C=CC(C%12=CC=CC=C%12)=C%13)=C%13C%14=C%11C=CC(C%15=CC=C(N(C%16=C%17C=C(C%18=CC=CC=C%18)C=C%16)C(CCCCCCCC)CCCCCCCC)C%17=C%15)=C%14)C=C%10)=C5)(C)C
PCzBN5	†††CC(C1=CC2=C(C3=C1)N(C4=CC=C(C(C)(C)C)C=C43)C5=C(B2C(C=C(C(C)(C)C)C=C67)=C6N8C9=C7C=C(C(C)(C)C)C=C9)C8=CC(C%10=CC=C(N%11C(C=CC(C%12=CC=CC=C%12)=C%13)=C%13C%14=C%11C=CC(C%15=CC=C(N(C%16=C%17C=C(C%18=CC=CC=C%18)C=C%16)C(CCCCCCCC)CCCCCCCC)C%17=C%15)=C%14)C=C%10)=C5)(C)C
D1-BNN	CC(C1=CC2=C(C3=C1)N(C4=CC=C(C(C)(C)C)C=C43)C5=C(B2C(C=C(C(C)(C)C)C=C67)=C6N8C9=C7C=C(C(C)(C)C)C=C9)C8=CC(N%10C(C=CC(C(C)(C)C)=C%11)=C%11C%12=C%10C=CC(C(C)(C)C)=C%12)=C5)(C)C
D2-BNN	CC(C1=CC2=C(C3=C1)N(C4=CC=C(C(C)(C)C)C=C43)C5=C(B2C(C=C(C(C)(C)C)C=C67)=C6N8C9=C7C=C(C(C)(C)C)C=C9)C8=CC(N%10C(C=CC(N%11C(C=CC(C(C)(C)C)=C%12)=C%12C%13=C%11C=CC(C(C)(C)C)=C%13)=C%14)=C%14C%15=C%10C=CC(N%16C(C=CC(C(C)(C)C)=C%17)=C%17C%18=C%16C=CC(C(C)(C)C)=C%18)=C%15)=C5)(C)C
D3-BNN	CC(C1=CC2=C(C3=C1)N(C4=CC=C(C(C)(C)C)C=C43)C5=C(B2C(C=C(C(C)(C)C)C=C67)=C6N8C9=C7C=C(C(C)(C)C)C=C9)C8=CC(N%10C(C=CC(N%11C(C=CC(N%12C(C=CC(C(C)(C)C)=C%13)=C%13C%14=C%12C=CC(C(C)(C)C)=C%14)=C%15)=C%15C%16=C%11C=CC(N%17C(C=CC(C(C)(C)C)=C%18)=C%18C%19=C%17C=CC(C(C)(C)C)=C%19)=C%16)=C%20)=C%20C%21=C%10C=CC(N%22C(C=CC(N%23C(C=CC(C(C)(C)C)=C%24)=C%24C%25=C%23C=CC(C(C)(C)C)=C%25)=C%26)=C%26C%27=C%22C=CC(…
BSeN-CZ	CC(C1=CC2=C(C=C1)[Se]C3=C(B2C(C=C(C(C)(C)C)C=C45)=C4N6C7=C5C=C(C(C)(C)C)C=C7)C6=CC(N8C(C=CC(C(C)(C)C)=C9)=C9C%10=C8C=CC(C(C)(C)C)=C%10)=C3)(C)C
BSeN-DCZ	CC(C1=CC2=C(C=C1)[Se]C3=C(B2C(C=C(C(C)(C)C)C=C45)=C4N6C7=C5C=C(C(C)(C)C)C=C7)C6=CC(N8C(C=CC(N9C(C=CC(C(C)(C)C)=C%10)=C%10C%11=C9C=CC(C(C)(C)C)=C%11)=C%12)=C%12C%13=C8C=CC(N%14C(C=CC(C(C)(C)C)=C%15)=C%15C%16=C%14C=CC(C(C)(C)C)=C%16)=C%13)=C3)(C)C
BSeN-TCZ	CC(C1=CC2=C(C=C1)[Se]C3=C(B2C(C=C(C(C)(C)C)C=C45)=C4N6C7=C5C=C(C(C)(C)C)C=C7)C6=CC(N8C(C=CC(N9C(C=CC(N%10C(C=CC(C(C)(C)C)=C%11)=C%11C%12=C%10C=CC(C(C)(C)C)=C%12)=C%13)=C%13C%14=C9C=CC(N%15C(C=CC(C(C)(C)C)=C%16)=C%16C%17=C%15C=CC(C(C)(C)C)=C%17)=C%14)=C%18)=C%18C%19=C8C=CC(N%20C(C=CC(N%21C(C=CC(C(C)(C)C)=C%22)=C%22C%23=C%21C=CC(C(C)(C)C)=C%23)=C%24)=C%24C%25=C%20C=CC(N%26C(C=CC(C(C)(C)C)=C%27)=C%2…
2PyBN	CC(C1=CC2=C(C3=C1)N(C4=CC=C(C(C)(C)C)C=C43)C5=C(B2C(C=C(C(C)(C)C)C=C67)=C6N8C9=C7C=C(C(C)(C)C)C=C9)C8=CC(C%10=CC=CC=N%10)=C5)(C)C
3PyBN	CC(C1=CC2=C(C3=C1)N(C4=CC=C(C(C)(C)C)C=C43)C5=C(B2C(C=C(C(C)(C)C)C=C67)=C6N8C9=C7C=C(C(C)(C)C)C=C9)C8=CC(C%10=CC=CN=C%10)=C5)(C)C
4PyBN	CC(C1=CC2=C(C3=C1)N(C4=CC=C(C(C)(C)C)C=C43)C5=C(B2C(C=C(C(C)(C)C)C=C67)=C6N8C9=C7C=C(C(C)(C)C)C=C9)C8=CC(C%10=CC=NC=C%10)=C5)(C)C
DtCzB-DPTRZ	CC(C1=CC2=C(C3=C1)N(C4=CC=C(C(C)(C)C)C=C43)C5=C(B2C(C=C(C(C)(C)C)C=C67)=C6N8C9=C7C=C(C(C)(C)C)C=C9)C8=CC(C%10=NC(C%11=CC=CC=C%11)=NC(C%12=CC=CC=C%12)=N%10)=C5)(C)C
DtCzB-TPTRZ	CC(C1=CC2=C(C3=C1)N(C4=CC=C(C(C)(C)C)C=C43)C5=C(B2C(C=C(C(C)(C)C)C=C67)=C6N8C9=C7C=C(C(C)(C)C)C=C9)C8=CC(C%10=CC=C(C%11=NC(C%12=CC=CC=C%12)=NC(C%13=CC=CC=C%13)=N%11)C=C%10)=C5)(C)C
DtCzB-PPm	CC(C1=CC2=C(C3=C1)N(C4=CC=C(C(C)(C)C)C=C43)C5=C(B2C(C=C(C(C)(C)C)C=C67)=C6N8C9=C7C=C(C(C)(C)C)C=C9)C8=CC(C%10=CN=C(C%11=CC=CC=C%11)N=C%10)=C5)(C)C
DtCzB-CNPm	N#CC(N=C1)=NC=C1C2=CC(N3C4=C5C=C(C(C)(C)C)C=C4C6=CC(C(C)(C)C)=CC=C36)=C(B5C(C=C(C(C)(C)C)C=C78)=C7N9C%10=C8C=C(C(C)(C)C)C=C%10)C9=C2
BN-R	CC(C1=CC=CC=C1)(C)C(C=C2)=CC=C2N(C3=CC=C(C(C)(C)C4=CC=CC=C4)C=C3)C(C=C5)=CC6=C5N7C8=C(C=C(N(C9=CC=C(C(C)(C)C%10=CC=CC=C%10)C=C9)C%11=CC=C(C(C)(C)C%12=CC=CC=C%12)C=C%11)C=C86)B%13C%14=C(N%15C%16=C%13C=C(N(C%17=CC=C(C(C)(C)C%18=CC=CC=C%18)C=C%17)C%19=CC=C(C(C)(C)C%20=CC=CC=C%20)C=C%19)C=C%16C%21=CC(N(C%22=CC=C(C(C)(C)C%23=CC=CC=C%23)C=C%22)C%24=CC=C(C(C)(C)C%25=CC=CC=C%25)C=C%24)=CC=C%15%21)C=C(C%2…
TCzBN-BP	O=C(C1=CC=CC=C1)C(C=C2)=CC=C2C3=CC(N4C5=C6C=C(C(C)(C)C)C=C5C7=CC(C(C)(C)C)=CC=C47)=C(B6C(C=C(C(C)(C)C)C=C89)=C8N%10C%11=C9C=C(C(C)(C)C)C=C%11)C%10=C3
TCzBN-FP	O=C1C2=C(C=CC=C2)C3=C1C=CC(C4=CC(N5C6=C7C=C(C(C)(C)C)C=C6C8=CC(C(C)(C)C)=CC=C58)=C(B7C(C=C(C(C)(C)C)C=C9%10)=C9N%11C%12=C%10C=C(C(C)(C)C)C=C%12)C%11=C4)=C3
BX-XTO	O=C(C1=C2C=CC=C1)C(C=C3)=C(O2)C=C3C4=CC(N5C6=C7C=C(C(C)(C)C)C=C6C8=CC(C(C)(C)C)=CC=C58)=C(B7C(C=C(C(C)(C)C)C=C9%10)=C9N%11C%12=C%10C=C(C(C)(C)C)C=C%12)C%11=C4
BN-STO	O=C(C1=C2C=CC=C1)C(C=C3)=C([Se]2)C=C3C4=CC(N5C6=C7C=C(C(C)(C)C)C=C6C8=CC(C(C)(C)C)=CC=C58)=C(B7C(C=C(C(C)(C)C)C=C9%10)=C9N%11C%12=C%10C=C(C(C)(C)C)C=C%12)C%11=C4
m-PCz-BNCz	CC(C1=CC2=C(C3=C1)N(C4=CC=C(C(C)(C)C)C=C43)C5=C(B2C(C=C(C(C)(C)C)C=C67)=C6N8C9=C7C=C(C(C)(C)C)C=C9)C8=CC=C5C%10=CC(C(C=CC=C%11)=C%11N%12C%13=CC=CC=C%13)=C%12C=C%10)(C)C
m-DPAcP-BNCz	CC(C1=CC2=C(C3=C1)N(C4=CC=C(C(C)(C)C)C=C43)C5=C(B2C(C=C(C(C)(C)C)C=C67)=C6N8C9=C7C=C(C(C)(C)C)C=C9)C8=CC=C5C%10=CC=C(N%11C(C=CC=C%12)=C%12C(C%13=CC=CC=C%13)(C%14=CC=CC=C%14)C%15=C%11C=CC=C%15)C=C%10)(C)C
m-BN-BNCz	N#CC(C=C1)=CC=C1C2=CC=C3C4=C2N(C5=CC=C(C(C)(C)C)C=C56)C(C6=CC(C(C)(C)C)=C7)=C7B4C(C=C(C(C)(C)C)C=C89)=C8N3C%10=C9C=C(C(C)(C)C)C=C%10
m-SF-BNCz	CC(C1=CC2=C(C3=C1)N(C4=CC=C(C(C)(C)C)C=C43)C5=C(B2C(C=C(C(C)(C)C)C=C67)=C6N8C9=C7C=C(C(C)(C)C)C=C9)C8=CC=C5C%10=CC(C%11(C%12=C%13C=CC=C%12)C%14=C(C=CC=C%14)C%15=C%11C=CC=C%15)=C%13C=C%10)(C)C
BN-DP	CC(C1=CC2=C(C3=C1)N(C4=CC=C(C(C)(C)C)C=C43)C5=C(B2C(C=C(C(C)(C)C)C=C67)=C6N8C9=C7C=C(C(C)(C)C)C=C9)C8=CC(C%10=CC=CC=C%10C%11=CC=CC=C%11)=C5)(C)C
BN-TP	CC(C1=CC2=C(C3=C1)N(C4=CC=C(C(C)(C)C)C=C43)C5=C(B2C(C=C(C(C)(C)C)C=C67)=C6N8C9=C7C=C(C(C)(C)C)C=C9)C8=CC%10=C5C%11=CC=CC=C%11C%12=CC=CC=C%10%12)(C)C
BN-TP-N1	CC(C1=CC2=C(C3=C1)N(C4=CC=C(C(C)(C)C)C=C43)C5=C(B2C(C=C(C(C)(C)C)C=C67)=C6N8C9=C7C=C(C(C)(C)C)C=C9)C8=CC%10=C5C%11=CC=CC=C%11C%12=CC=CN=C%10%12)(C)C
BN-TP-N2	CC(C1=CC2=C(C3=C1)N(C4=CC=C(C(C)(C)C)C=C43)C5=C(B2C(C=C(C(C)(C)C)C=C67)=C6N8C9=C7C=C(C(C)(C)C)C=C9)C8=CC%10=C5C%11=CC=CC=C%11C%12=CN=CC=C%10%12)(C)C
BN-TP-N3	CC(C1=CC2=C(C3=C1)N(C4=CC=C(C(C)(C)C)C=C43)C5=C(B2C(C=C(C(C)(C)C)C=C67)=C6N8C9=C7C=C(C(C)(C)C)C=C9)C8=CC%10=C5C%11=CC=CC=C%11C%12=CC=NC=C%10%12)(C)C
BN-TP-N4	CC(C1=CC2=C(C3=C1)N(C4=CC=C(C(C)(C)C)C=C43)C5=C(B2C(C=C(C(C)(C)C)C=C67)=C6N8C9=C7C=C(C(C)(C)C)C=C9)C8=CC%10=C5C%11=CC=CC=C%11C%12=NC=CC=C%10%12)(C)C
p-CzB	CC(C1=CC2=C(C3=C1)N(C4=CC=C(C(C)(C)C)C=C43)C5=C(B2C(C=C(C(C)(C)C)C=C67)=C6N8C9=C7C=C(C(C)(C)C)C=C9)C8=CC(C%10=CC(N%11C%12=C%13C=C(C(C)(C)C)C=C%12C%14=CC(C(C)(C)C)=CC=C%11%14)=C(B%13C(C=C(C(C)(C)C)C=C%15%16)=C%15N%17C%18=C%16C=C(C(C)(C)C)C=C%18)C%17=C%10)=C5)(C)C
m-CzB	CC(C1=CC2=C(C3=C1)N(C4=CC=C(C(C)(C)C)C=C43)C5=C(B2C(C=C(C(C)(C)C)C=C67)=C6N8C9=C7C=C(C(C)(C)C)C=C9)C8=CC=C5C%10=CC=C%11C%12=C%10N(C%13=CC=C(C(C)(C)C)C=C%13%14)C(C%14=CC(C(C)(C)C)=C%15)=C%15B%12C(C=C(C(C)(C)C)C=C%16%17)=C%16N%11C%18=C%17C=C(C(C)(C)C)C=C%18)(C)C
CN-BCz-BN	N#CC1=CC(N2C3=C4C=C(C(C)(C)C)C=C3C5=CC(C(C)(C)C)=CC=C25)=C(B4C(C=C(C(C)(C)C)C=C67)=C6N8C9=C7C=C(C(C)(C)C)C=C9)C8=C1
CNCz-BNCz	N#CC1=C(N2C3=C(C=C(C(C)(C)C)C=C3)C4=C2C=CC(C(C)(C)C)=C4)C(N5C6=C7C=C(C(C)(C)C)C=C6C8=CC(C(C)(C)C)=CC=C58)=C(B7C(C=C(C(C)(C)C)C=C9%10)=C9N%11C%12=C%10C=C(C(C)(C)C)C=C%12)C%11=C1N%13C%14=C(C=C(C(C)(C)C)C=C%14)C%15=C%13C=CC(C(C)(C)C)=C%15
ν-DABNA-CN-Me	N#CC1=CC2=C(C=C1)B(C3=CC4=C(C=C3N5C6=CC=CC=C6)N(C7=CC(N(C8=CC(C)=CC(C)=C8)C9=CC(C)=CC(C)=C9)=CC%10=C7B4C%11=CC=C(C=C%11N%10C%12=CC(C)=CC(C)=C%12)C#N)C%13=CC=CC=C%13)C%14=C5C=C(N(C%15=CC(C)=CC(C)=C%15)C%16=CC(C)=CC(C)=C%16)C=C%14N2C%17=CC(C)=CC(C)=C%17
BN(p)SCH3	CSC1=CC(N2C3=C4C=C(C(C)(C)C)C=C3C5=CC(C(C)(C)C)=CC=C25)=C(B4C(C=C(C(C)(C)C)C=C67)=C6N8C9=C7C=C(C(C)(C)C)C=C9)C8=C1
BN(p)SOCH3	CS(C1=CC(N2C3=C4C=C(C(C)(C)C)C=C3C5=CC(C(C)(C)C)=CC=C25)=C(B4C(C=C(C(C)(C)C)C=C67)=C6N8C9=C7C=C(C(C)(C)C)C=C9)C8=C1)=O
BN(p)SO2CH3	O=S(C1=CC(N2C3=C4C=C(C(C)(C)C)C=C3C5=CC(C(C)(C)C)=CC=C25)=C(B4C(C=C(C(C)(C)C)C=C67)=C6N8C9=C7C=C(C(C)(C)C)C=C9)C8=C1)(C)=O
TCzBN-S	CC(C1=CC2=C(C3=C1)N(C4=CC=C(C(C)(C)C)C=C43)C5=C(B2C(C=C(C(C)(C)C)C=C67)=C6N8C9=C7C=C(C(C)(C)C)C=C9)C8=CC(C%10=CC=C(SC%11=CC=CC=C%11)C=C%10)=C5)(C)C
TCzBN-SO	O=S(C(C=C1)=CC=C1C2=CC(N3C4=C5C=C(C(C)(C)C)C=C4C6=CC(C(C)(C)C)=CC=C36)=C(B5C(C=C(C(C)(C)C)C=C78)=C7N9C%10=C8C=C(C(C)(C)C)C=C%10)C9=C2)(C%11=CC=CC=C%11)=O
tCBNDADPO	O=P(C1=CC=CC=C1)(C2=CC=CC=C2)C(C=C3)=CC=C3N(C4=CC=C(P(C5=CC=CC=C5)(C6=CC=CC=C6)=O)C=C4)C7=CC(N(C8=CC=CC=C8)C9=C%10C=CC=C9)=C(B%10C(C=C(C(C)(C)C)C=C%11%12)=C%11N%13C%14=C%12C=C(C(C)(C)C)C=C%14)C%13=C7
Czp-tBuCzB	CC(C(C=C1)=CC2=C1N3C4=C(C=C(C(C)(C)C)C=C42)B5C6=C(N7C8=C5C=C(C(C)(C)C)C=C8C9=CC(C(C)(C)C)=CC=C79)C=C(N%10C(C%11=CC=C%12CCC(C=C%13)=CC=C%13CC%11)=C%12C%14=C%10C=CC=C%14)C=C63)(C)C
Czp-POAB	C12=CC(N3C(C4=CC=C5CCC(C=C6)=CC=C6CC4)=C5C7=C3C=CC=C7)=CC(N8C9=C%10C=CC=C9OC%11=C8C=CC=C%11)=C1B%10C%12=C%13N2C%14=C(C=CC=C%14)OC%13=CC=C%12
OBN-2CZ-BN	N#CC1=CC2=C(OC(C=CC3=C4CCCC3)=C4C(C(CCCC5)=C5C=C6)=C6O2)C=C1C7=CC(N8C9=C%10C=C(C(C)(C)C)C=C9C%11=CC(C(C)(C)C)=CC=C8%11)=C(B%10C(C=C(C(C)(C)C)C=C%12%13)=C%12N%14C%15=C%13C=C(C(C)(C)C)C=C%15)C%14=C7
OBN-4CN-BN	N#CC(C=C1)=C2C(OC(C=CC3=C4CCCC3)=C4C(C(CCCC5)=C5C=C6)=C6O2)=C1C7=CC(N8C9=C%10C=C(C(C)(C)C)C=C9C%11=CC(C(C)(C)C)=CC=C8%11)=C(B%10C(C=C(C(C)(C)C)C=C%12%13)=C%12N%14C%15=C%13C=C(C(C)(C)C)C=C%15)C%14=C7
IrBBacac	CC1C=C(C)O[Ir]23(C4=C(OC5=C6C=CC=C5)C(B67)=C(OC8=C7C=CC=C8)C=C4C9=CC=CC=[N]93)(O1)[N]%10=CC=CC=C%10C%11=CC(OC%12=C%13C=CC=C%12)=C(B%14%13)C(OC%15=C%14C=CC=C%15)=C%112
IrBNacac	CC1C=C(C)O[Ir]23(C4=C(OC5=C6C=CC=C5)C(N67)=C(OC8=C7C=CC=C8)C=C4C9=CC=CC=[N]93)(O1)[N]%10=CC=CC=C%10C%11=CC(OC%12=C%13C=CC=C%12)=C(B%14%13)C(OC%15=C%14C=CC=C%15)=C%112
PtBacac	CC1=CC(C)=O[Pt]2(C3=C(OC4=C5C=CC=C4)C(B56)=C(OC7=C6C=CC=C7)C=C3C8=CC=CC=[N]82)O1
PtBbby	F[P-](F)(F)(F)(F)F.C1(OC2=C(B34)C(OC5=C3C=CC=C5)=C([Pt+]6([N]7=CC=CC=C7C8=[N]6C=CC=C8)[N]9=CC=CC=C%109)C%10=C2)=C4C=CC=C1.
(SIPr)AuBN	CC(C1=CC2=C(C3=C1)N(C4=CC=C(C(C)(C)C)C=C43)C5=C(B2C(C=C(C(C)(C)C)C=C67)=C6N8C9=C7C=C(C(C)(C)C)C=C9)C8=CC([Au]c%10n(C%11=C(C(C)C)C=CC=C%11C(C)C)CCn%10C%12=C(C(C)C)C=CC=C%12C(C)C)=C5)(C)C
(IPr)AuBN	CC(C1=CC2=C(C3=C1)N(C4=CC=C(C(C)(C)C)C=C43)C5=C(B2C(C=C(C(C)(C)C)C=C67)=C6N8C9=C7C=C(C(C)(C)C)C=C9)C8=CC([Au]c%10n(C%11=C(C(C)C)C=CC=C%11C(C)C)C=Cn%10C%12=C(C(C)C)C=CC=C%12C(C)C)=C5)(C)C
(BzIPr)AuBN	CC(C1=CC2=C(C3=C1)N(C4=CC=C(C(C)(C)C)C=C43)C5=C(B2C(C=C(C(C)(C)C)C=C67)=C6N8C9=C7C=C(C(C)(C)C)C=C9)C8=CC([Au]c%10n(C%11=C(C(C)C)C=CC=C%11C(C)C)C%12=C(C=CC=C%12)n%10C%13=C(C(C)C)C=CC=C%13C(C)C)=C5)(C)C
(PyIPr)AuBN	CC(C1=CC2=C(C3=C1)N(C4=CC=C(C(C)(C)C)C=C43)C5=C(B2C(C=C(C(C)(C)C)C=C67)=C6N8C9=C7C=C(C(C)(C)C)C=C9)C8=CC([Au]c%10n(C%11=C(C(C)C)C=CC=C%11C(C)C)C%12=C(N=CC=C%12)n%10C%13=C(C(C)C)C=CC=C%13C(C)C)=C5)(C)C
(PzIPr)AuBN	CC(C1=CC2=C(C3=C1)N(C4=CC=C(C(C)(C)C)C=C43)C5=C(B2C(C=C(C(C)(C)C)C=C67)=C6N8C9=C7C=C(C(C)(C)C)C=C9)C8=CC([Au]c%10n(C%11=C(C(C)C)C=CC=C%11C(C)C)C%12=C(N=CC=N%12)n%10C%13=C(C(C)C)C=CC=C%13C(C)C)=C5)(C)C
(BzIPr)AuBNO	CC(C1=CC2=C(C3=C1)N(C4=CC=C(C(C)(C)C)C=C43)C5=C(B2C(C=C(C(C)(C)C)C=C6C(C)(C)C)=C6O7)C7=CC([Au]c8n(C9=C(C(C)C)C=CC=C9C(C)C)C%10=C(C=CC=C%10)n8C%11=C(C(C)C)C=CC=C%11C(C)C)=C5)(C)C
HBC-3BO	CC(C1=CC2=C(OC3=C(B42)C(OC5=C4C=C(C(C)(C)C)C=C5)=C6C7=C3C(C=C(C(C)(C)C)C=C89)=C8C%10=C7C(C%11=C%12C=C(C(C)(C)C)C=C%116)=C(C%13=C%14C(OC%15=C%16C=C(C(C)(C)C)C=C%15)=C(B%16C(C=C(C(C)(C)C)C=C%17)=C%17O%18)C%18=C%13%12)C%19=C%10C%20=C9C(OC(C=CC(C(C)(C)C)=C%21)=C%21B%22C(C=C(C(C)(C)C)C=C%23)=C%23O%24)=C%22C%24=C%20C%25=C%19C%14=CC(C(C)(C)C)=C%25)C=C1)(C)C
HBC-6BO	CC(C(C=C1)=CC2=C1OC3=C4C(C5=C(C6=C4C(OC7=C8C=C(C(C)(CC(C)(C)C)C)C=C7)=C(B8C(C=C(C(C)(CC(C)(C)C)C)C=C9)=C9O%10)C%10=C6C%11=C%12C%13=C%14C%15=C%11OC(C=CC(C(C)(CC(C)(C)C)C)=C%16)=C%16B%15C(C=C(C(C)(CC(C)(C)C)C)C=C%17)=C%17O%14)C%12=C(C%18=C%13C(OC%19=C%20C=C(C(C)(CC(C)(C)C)C)C=C%19)=C(B%20C(C=C(C(C)(CC(C)(C)C)C)C=C%21)=C%21O%22)C%22=C%18%23)C%24=C5C%25=C(C%26=C%24C%23=C(OC%27=C%28C=C(C(C)(CC(C)(C)C)…
[1,2-b]IF-α-DOBNA	CC1=CC(C)=CC(C)=C1C(C2=C3C=C4C5=C2OC(C=CC(CC)=C6)=C6B5C(C=C(CC)C=C7)=C7O4)=C(C3=C8)C=C9C8=C(C%10=C(C)C=C(C)C=C%10C)C%11=C9C=C%12C%13=C%11OC(C=CC(CC)=C%14)=C%14B%13C(C=C(CC)C=C%15)=C%15O%12
[2,1-b]IF-α-DOBNA	CC1=CC(C)=CC(C)=C1C(C2=C3C=C4C5=C2OC(C=CC(CC)=C6)=C6B5C(C=C(CC)C=C7)=C7O4)=C(C3=C8)C=C9C8=C(C=C%10C%11=C%12OC%13=C(C=C(CC)C=C%13)B%11C%14=C(C=CC(CC)=C%14)O%10)C%12=C9C%15=C(C)C=C(C)C=C%15C
[1,2-b]IF-β-DOBNA	CC1=CC(C)=CC(C)=C1C(C2=C3C4=C5C(OC(C=CC(CC)=C6)=C6B5C(C=C(CC)C=C7)=C7O4)=C2)=C(C3=C8)C=C9C8=C(C%10=C(C)C=C(C)C=C%10C)C%11=C9C%12=C(B%13C(C=C(CC)C=C%14)=C%14O%12)C(OC%15=C%13C=C(CC)C=C%15)=C%11
[1,2-b]IF-α-BCzBN	CC1=CC(C)=CC(C)=C1C(C2=C3C=C4C5=C2N(C6=CC=C(C(C)(C)C)C=C67)C(C7=CC(C(C)(C)C)=C8)=C8B5C(C=C(C(C)(C)C)C=C9%10)=C9N4C%11=C%10C=C(C(C)(C)C)C=C%11)=C(C3=C%12)C=C%13C%12=C(C%14=C(C)C=C(C)C=C%14C)C%15=C%13C=C%16C%17=C%15N(C%18=CC=C(C(C)(C)C)C=C%18%19)C(C%19=CC(C(C)(C)C)=C%20)=C%20B%17C(C=C(C(C)(C)C)C=C%21%22)=C%21N%16C%23=C%22C=C(C(C)(C)C)C=C%23
[1,2-b]FF-α-BCzBN	CC1=CC(C)=CC(C)=C1C(C2=C3C=C4C5=C2N(C6=CC=C(C(C)(C)C)C=C67)C(C7=CC(C(C)(C)C)=C8)=C8B5C(C=C(C(C)(C)C)C=C9%10)=C9N4C%11=C%10C=C(C(C)(C)C)C=C%11)=C(C3=C%12)C=C%13C%12=CC%14=C(C%15=C(C)C=C(C)C=C%15C)C(C(N(C%16=CC=C(C(C)(C)C)C=C%16%17)C(C%17=CC(C(C)(C)C)=C%18)=C%18B%19C(C=C(C(C)(C)C)C=C%20%21)=C%20N%22C%23=C%21C=C(C(C)(C)C)C=C%23)=C%19C%22=C%24)=C%24C%14=C%13
BO-NO	C1(OC2=C(B34)C(OC5=C4C=CC=C5)=CC(C6=CC(OC(C=CC=C7)=C7N8C(C=CC=C9)=C9O%10)=C8C%10=C6)=C2)=C3C=CC=C1
IrBBacac	CC1C=C(C)O[Ir]23(C4=C(OC5=C6C=CC=C5)C(B67)=C(OC8=C7C=CC=C8)C=C4C9=CC=CC=[N]93)(O1)[N]%10=CC=CC=C%10C%11=CC(OC%12=C%13C=CC=C%12)=C(B%14%13)C(OC%15=C%14C=CC=C%15)=C%112
BCzBN	CC(C1=CC2=C(C3=C1)N(C4=CC=C(C(C)(C)C)C=C43)C5=C(B2C(C=C(C(C)(C)C)C=C67)=C6N8C9=C7C=C(C(C)(C)C)C=C9)C8=CC=C5)(C)C
[1,2-b]IF-β-DOBNA	CC1=CC(C)=CC(C)=C1C(C2=C3C4=C5C(OC(C=CC(CC)=C6)=C6B5C(C=C(CC)C=C7)=C7O4)=C2)=C(C3=C8)C=C9C8=C(C%10=C(C)C=C(C)C=C%10C)C%11=C9C%12=C(B%13C(C=C(CC)C=C%14)=C%14O%12)C(OC%15=C%13C=C(CC)C=C%15)=C%11
B1	CCCCN1C(C2=CC3=C(OC4=CC=CC(O5)=C4B3C6=C5C=CC(C7=NC=NN7CCCC)=C6)C=C2)=NC=N1
B2	CC1=CC=NC(OC2=CC3=C(OC4=CC=CC(O5)=C4B3C6=C5C=CC(C7=NC=NN7CCCC)=C6)C=C2)=C1
B3	CN(C)C1=CC2=C(OC3=CC=CC(O4)=C3B2C5=C4C=CC(C6=NC=NN6CCCC)=C5)C=C1
B4	CCCCCCN1N=NC(C2=CC3=C(OC4=C(B35)C(OC6=C5C=C(C7=CN(CCCCCC)N=N7)C=C6)=CC=C4)C=C2)=C1
B5	C1(OC2=C(B34)C(OC5=C4C=C(C6=CN7N=N6)C=C5)=CC=C2)=C3C=C(C8=CN(CCCCCCCCCCCC7)N=N8)C=C1
S-B1	O=C(C1=CC(OCC[C@@H](C)CCCC(C)C)=C(OCC[C@@H](C)CCCC(C)C)C(OCC[C@@H](C)CCCC(C)C)=C1)NC2=CC=C(C3=CC(OC4=C5C=CC(C6=CC=C(NC(C7=CC(OCC[C@H](C)CCCC(C)C)=C(OCC[C@H](C)CCCC(C)C)C(OCC[C@H](C)CCCC(C)C)=C7)=O)C=C6)=C4)=C(B85)C(OC9=C8C=CC(C%10=CC=C(NC(C%11=CC(OCC[C@@H](C)CCCC(C)C)=C(OCC[C@@H](C)CCCC(C)C)C(OCC[C@@H](C)CCCC(C)C)=C%11)=O)C=C%10)=C9)=C3)C=C2
a-3BNOH	CC(C=C1)=CC=C1N2C3=CC(N(C4=CC=C(C)C=C4)C5=CC=C(C)C=C5B6O)=C6C=C3B(O)C7=C2C=C(N(C8=CC=C(C)C=C8)C9=C%10C=C(C)C=C9)C(B%10O)=C7
a-3BNMes	CC(C=C1)=CC=C1N2C3=CC(N(C4=CC=C(C)C=C4)C5=CC=C(C)C=C5B6C7=C(C)C=CC=C7C)=C6C=C3B(C8=C(C)C=CC=C8C)C9=C2C=C(N(C%10=CC=C(C)C=C%10)C%11=C%12C=C(C)C=C%11)C(B%12C%13=C(C)C=CC=C%13C)=C9
BIC-mCz	CC(C=CC=C1C)=C1B2C3=C(C4=CC(C(C)(C)C)=C3)N(C5=CC=C(C(C)(C)C)C=C54)C6=C2C=CC(N7C8=CC=C(C(C)(C)C)C=C8C9=C7C=CC(C(C)(C)C)=C9)=C6
mDBIC	CC(C=CC=C1C)=C1B2C3=C(C4=CC(C(C)(C)C)=C3)N(C5=CC=C(C(C)(C)C)C=C54)C6=C2C=C(B7C8=C(C)C=CC=C8C)C(N9C%10=C7C=C(C(C)(C)C)C=C%10C%11=C9C=CC(C(C)(C)C)=C%11)=C6
BIC-pCz	CC(C=CC=C1C)=C1B2C3=C(C4=CC(C(C)(C)C)=C3)N(C5=CC=C(C(C)(C)C)C=C54)C6=C2C=C(N(C7=CC=C(C(C)(C)C)C=C78)C9=C8C=C(C(C)(C)C)C=C9)C=C6
pDBIC	CC1=CC=CC(C)=C1B2C3=CC(C(C)(C)C)=CC4=C3N(C5=CC=C(C(C)(C)C)C=C54)C6=CC7=C(N8C9=C(B7C%10=C(C)C=CC=C%10C)C=C(C(C)(C)C)C=C9C%11=CC(C(C)(C)C)=CC=C8%11)C=C62
